# Supplementary material for: Association between adolescent motherhood and maternal and child health indices in Maiduguri, Nigeria: a community-based cross-sectional study
Source: PubMed Central journal article supplement — BMJ Open. 2019 Mar 8;9(3):e024017. doi: 10.1136/bmjopen-2018-024017 (PMC6429880; doi:10.1136/bmjopen-2018-024017), 2019-03-08
Supplement: bmjopen-2018-024017.draft_revisions.pdf [file bmjopen-2018-024017.draft_revisions.pdf]

# BMJ Open

BMJ Open is committed to open peer review. As part of this commitment we make the peer review history of every article we publish publicly available.

When an article is published we post the peer reviewers' comments and the authors' responses online. We also post the versions of the paper that were used during peer review. These are the versions that the peer review comments apply to.

The versions of the paper that follow are the versions that were submitted during the peer review process. They are not the versions of record or the final published versions. They should not be cited or distributed as the published version of this manuscript.

BMJ Open is an open access journal and the full, final, typeset and author-corrected version of record of the manuscript is available on our site with no access controls, subscription charges or pay-per-view fees (<http://bmjopen.bmj.com>).

If you have any questions on BMJ Open's open peer review process please email [info.bmjopen@bmj.com](mailto:info.bmjopen@bmj.com)

# BMJ Open

## Association between adolescent motherhood and maternal and child health indices: A community-based study in Maiduguri, Nigeria

|                               |                                                                                                                                                                                                                                                                                                                                                                                                                                                                                                                 |
|-------------------------------|-----------------------------------------------------------------------------------------------------------------------------------------------------------------------------------------------------------------------------------------------------------------------------------------------------------------------------------------------------------------------------------------------------------------------------------------------------------------------------------------------------------------|
| Journal:                      | <i>BMJ Open</i>                                                                                                                                                                                                                                                                                                                                                                                                                                                                                                 |
| Manuscript ID                 | bmjopen-2018-024017                                                                                                                                                                                                                                                                                                                                                                                                                                                                                             |
| Article Type:                 | Research                                                                                                                                                                                                                                                                                                                                                                                                                                                                                                        |
| Date Submitted by the Author: | 04-May-2018                                                                                                                                                                                                                                                                                                                                                                                                                                                                                                     |
| Complete List of Authors:     | Oyeyemi, Adewale; University of Maiduguri Medical College, Physiotherapy<br>Aliyu, Salamatu; University of Maiduguri Medical College, Physiotherapy<br>Sa'ad, Fatima; Neuropsychiatric Hospital Maiduguri, Physiotherapy<br>Rufa'i, Adamu; University of Maiduguri, Physiotherapy; Universiti Sains<br>Malaysia, School of Health Sciences<br>Jajere, AbdulRahman; University of Maiduguri Teaching Hospital,<br>Physiotherapy<br>Oyeyemi, Adetoyeje; University of Maiduguri Medical College,<br>Physiotherapy |
| Keywords:                     | OBSTETRICS, Public health < INFECTIOUS DISEASES, Community<br>gynaecology < GYNAECOLOGY, PRIMARY CARE                                                                                                                                                                                                                                                                                                                                                                                                           |
|                               |                                                                                                                                                                                                                                                                                                                                                                                                                                                                                                                 |

SCHOLARONE™  
Manuscripts

1  
2  
3 **Association between adolescent motherhood and maternal and child health indices: A**  
4 **community-based study in Maiduguri, Nigeria**  
5

6 Adewale L Oyeyemi,<sup>1</sup> Salamatu U Aliyu,<sup>1</sup> Fatima Sa'ad,<sup>2</sup> Adamu A Rufai,<sup>1</sup>  
7 Abdulrahman M Jajere,<sup>3</sup> Adetoyeje Y Oyeyemi<sup>3\*</sup>  
8  
9

10  
11  
12 <sup>1</sup>Department of Medical Rehabilitation (Physiotherapy), University of Maiduguri, Maiduguri,  
13 Borno State, Nigeria.  
14

15  
16 <sup>2</sup>Department of Physiotherapy, Neuropsychiatric Hospital, Maiduguri, Borno State, Nigeria.  
17

18  
19 <sup>3</sup>Department of Physiotherapy, University of Maiduguri Teaching Hospital, Maiduguri, Borno  
20 State, Nigeria.  
21

22  
23  
24  
25  
26  
27  
28 -----  
29  
30  
31 **Corresponding Author**

32 Dr. Adetoyeje Y. Oyeyemi, Department of Medical Rehabilitation (Physiotherapy), University of  
33 Maiduguri, Maiduguri, Borno State, Nigeria; E-mail: adeoyeyemi@aol.com  
34  
35  
36  
37  
38  
39  
40  
41  
42  
43  
44  
45  
46  
47  
48  
49  
50  
51  
52  
53  
54  
55  
56  
57  
58  
59  
60

## ABSTRACT

**Introduction:** Understanding the impact of early marriage and motherhood on maternal and child health indices is important to community and population health promotion. This study examined the associations between adolescent motherhood and maternal and child health indices in Maiduguri, Nigeria.

**Methods:** A cross-sectional design method was used to recruit 220 mothers from four communities in the city of Maiduguri, Northeastern Nigeria. Participants were surveyed using a self-developed interviewer administered questionnaire consisting of two parts. Part I elicited socio-demographic characteristics while part II consisted of items assessing maternal and child health indices. Logistic regression analysis was used to compute adjusted odd ratios (OR) and 95% confidence interval (95%CI) of the associations between motherhood in adolescence (mothers between 12-17 years) and maternal and child health indices.

**Results:** Adolescent mothers were more likely to experience fistula (OR=5.01, 95%CI=3.01-14.27), to have postpartum hemorrhage (OR=6.83, 95%CI=2.93-15.92), to have sexually transmitted infections (OR=6.29, 95%CI=2.26-17.51) and to lose a child within 5 years of birth (OR=3.52, 95%CI=1.07-11.60), compared to adult mothers. Children born to adolescent mothers were less likely to have normal weight at birth (OR=0.34, CI=0.15-0.73) than those born to adult mothers.

**Conclusion:** Adolescent motherhood was associated with negative maternal and child health indices. The findings suggest that community health promotion and public health interventions should focus on improving maternal and child health indices among adolescent mothers in Maiduguri, Nigeria. Future studies are needed to confirm this evidence at the regional or national level including the rural population in Nigeria.

**Keywords:** Early marriage, teenage mothers, maternal health indices, child health indices

### Strengths and limitations of this study

- This is one of the few community-based studies to assess the impact of early marriage and adolescent motherhood on maternal and child health indices in Nigeria
- The study utilized equal sample of early married and non-early married mothers to make the result more robust
- Evidence from the data can be used to inform effective primary care practice and public health campaign to improve maternal and child health among early married mothers in the medically underserved and economically disadvantaged Northeast region of Nigeria
- The study involved a convenience sample of urban community dwelling mothers, so findings may not generalize to other samples with different characteristics in Nigeria
- Causality between adolescent motherhood and maternal and child health indices cannot be inferred due to the cross-sectional design of the study

## INTRODUCTION

Early or child marriage is defined as a formal marriage or informal union entered into by an individual before reaching the age of 18 years.<sup>1,2</sup> Worldwide, approximately 750 million girls and women were married before the age of 18.<sup>3</sup> Across Africa, 125 million girls and women alive today were married before their 18th birthday.<sup>4</sup> This practice is most common in West and Central Africa where more than 4 in 10 girls were married before age 18, and about 1 in 7 were married or in union before age 15.<sup>3</sup> Early marriage has been observed for both boys and girls, but the overwhelming majority of those affected by the practice are girls in poor socio-economic conditions.<sup>1,2,5</sup> Underage-brides are often likely to be forced into sexual activities and commence child bearing early and are therefore at higher risks of death from complications of pregnancy and child birth.<sup>2,6</sup> They are also at risk for developing health complications arising from early marriage that includes; heavy bleeding, sexually transmitted infections, eclampsia, obstructed labour and obstetric fistula, all due to physical and sexual immaturity.<sup>1,5,7,8</sup> Moreover, due to adolescents' physiological and social immaturity and their lack of adequate prenatal care, health risks associated with pregnancies and childbearing are more pronounced among them than among older women.<sup>6,9</sup>

High death rates among adolescent mothers are usually due to eclampsia, postpartum hemorrhage, sepsis, HIV infection, malaria, and obstructed labor.<sup>9</sup> In developing countries, these problems may occur as a result of lack of preconception care that include education, health promotion, screening and other interventions among women of reproductive age.<sup>10</sup> Another factor is lack of access to postnatal care which include intervention to facilitate speedy recovery after birth, and to address concerns about newborn care, nutrition, breastfeeding, and family planning.<sup>11,12</sup> In most African countries, many of the problems associated with childbearing are also partly attributed to lack of timely and appropriate health care attention during pregnancy.<sup>7</sup> Adolescent mothers are more susceptible to anemia than adults and this greatly increases the risk and complications linked to pregnancy,<sup>7</sup> especially with the added pressure to prove their fertility in the first year of marriage as is the cultural practice in many developing countries.<sup>2,5,9</sup>

In Nigeria, the practice of early marriage is believed to be rampant because an estimated 28.7% of girls (absolute number=2,470,183) were married before the age of 18 as of 2010.<sup>13</sup> This prevalence is expected to double by 2050 and Nigeria is expected to have the largest absolute

1  
2  
3 number of child bride in the coming decades.<sup>5</sup> Although, Nigeria contributed 1 in 5 and 1 in 4 of  
4 the global and regional maternal deaths,<sup>14</sup> respectively, yet there is paucity of evidence on the  
5 impact of early marriage and adolescent motherhood on maternal and child health indices in  
6 Nigeria. Therefore, to enhance effective maternal and child health interventions in the vulnerable  
7 population subgroups, it is important to understand the impact of child marriage on maternal and  
8 child health in Nigeria. A recent study in North east Nigeria reported high maternal morbidity  
9 through various pregnancy complications among residents of Gombi, a town in Adamawa  
10 State.<sup>15</sup> However, until now, there is no report on the impact of adolescent motherhood on  
11 maternal and child health indices in Maiduguri, Borno State of Nigeria.  
12  
13  
14  
15  
16  
17  
18

19  
20 Maiduguri city is the origin of a religious uprising which started in 2009 and became  
21 escalated to an armed insurgency in the northeastern Nigeria which continues until 2016 when  
22 the insurgency activities within the city became degraded. This city however houses Internally  
23 Displaced Persons including adolescent mothers, in several camps up till now. The present study  
24 aimed to examine the associations between motherhood in adolescence (mothers between 12-17  
25 years old) and maternal and child health indices in Maiduguri, Nigeria. This is a preliminary  
26 attempt to provide insights into the impact of early marriage on population health in the most  
27 economically disadvantaged and medically underserved region of Nigeria. In the present study,  
28 the terms adolescent mothers, teenage brides and minor mothers are used interchangeably to  
29 describe adolescent girls who were married before the age of 18.  
30  
31  
32  
33  
34  
35  
36

## 37 **METHODS**

### 38 **Setting, design and participants**

39  
40  
41  
42 The study was conducted in Maiduguri which is the capital city of Borno State and the  
43 commercial center of the north eastern geopolitical zone of Nigeria. This zone comprising of six  
44 states including Yobe, Adamawa, Taraba, Bauchi, Gombe and the Borno States, is considered to  
45 be economically disadvantaged with least manpower resources and is also the most medically  
46 underserved zone in the Nigeria.<sup>16</sup> The city of Maiduguri has an estimated population of 1.2  
47 million people.<sup>17</sup>  
48  
49  
50  
51  
52  
53

54 The study adopted a cross-sectional survey design. The participants were 220 mothers  
55 (aged = 12 - 25 years) recruited from their various households in *Gwange, Bulunkutu, Lamisula*  
56  
57  
58  
59

1  
2  
3 and *Kofa biyu* communities (wards) of Maiduguri city. The multistage (3 stages) sampling  
4 technique was used to select participants into the study. In stage one, four wards were randomly  
5 selected from the available 15 communities in Maiduguri, and from these communities, three  
6 streets were randomly selected in the second stage. In stage three, houses and participants were  
7 selected using convenient sampling technique. From each of the selected houses, mothers that  
8 met the inclusion criteria and were willing to participate were recruited into the study. Mothers  
9 that got married at the age of 26 years and above, those that were experiencing their first  
10 pregnancy and has not yet put to bed and mothers that married for more than 10 years, were  
11 excluded from the study. Data collection and all measurements were completed at the  
12 participants' home. All participants provided signed informed consent and the study was  
13 approved by the Ethics Committee of the University of Maiduguri Teaching Hospital.  
14  
15  
16  
17  
18  
19  
20  
21  
22

### 23 **Instruments**

24 For this cross sectional survey study, socio-demographic form was used to collect  
25 information about the participant's characteristics. These include age, marital status, age at time  
26 of marriage, years of marriage, number of children ever born, level of formal education,  
27 occupation, religion, area of residence and socio-economic status. A structured questionnaire was  
28 developed from insights provided through two previous studies.<sup>15,18</sup> The self-developed  
29 questionnaire was interviewer administered and contains 17 items that assess maternal and child  
30 health concerns. The questionnaire has two sections. Section A addresses maternal health indices  
31 while section B addresses child health indices. The respondents were asked series of questions  
32 such as 'have you ever experience domestic violence', 'have you ever experienced pregnancy related  
33 complications', 'have you ever had sexually transmitted infections (STI)', 'was your child's weight at  
34 birth low', did the child suffer any infectious illness two weeks after birth', and 'was any child lost in the  
35 last five years'. The response to the questions was anchored on a dichotomous scale, (1) Yes or  
36 (2) No. The face and content validity of the questionnaire was evaluated by two experts who are  
37 specialists in obstetrics and gynecology and maternal and child health. These specialists have a  
38 combined experience of over 23 years and they attested to the face and content validity of the  
39 developed questionnaire. The participants' weight and height were measured following  
40 standardized procedure, using a bathroom weighing scale (HANA, China) and a locally  
41 fabricated wooden height meter that was calibrated, respectively.  
42  
43  
44  
45  
46  
47  
48  
49  
50  
51  
52  
53  
54  
55  
56  
57  
58  
59  
60



## Data analyses

Analyses were conducted using the Statistical Package for the Social Science (SPSS) versions 18. Descriptive statistics of mean, standard deviation and percentages were used to summarize the participants' socio-demographic characteristics, socio-economic status and marriage and pregnancy history. Chi-square statistic was used to compare the prevalence of maternal (obstetric fistula, sexually transmitted disease, postpartum hemorrhage and eclampsia) and child (low birth weight, child infectious illness and child mortality) health indices between adolescent mothers (age= 12-17 years) and non-adolescent mothers (age= 18-25 years). Logistic regression analysis adjusted for participants' sociodemographic characteristics, socioeconomic status and marriage and pregnancy history was used to examine the associations between motherhood in adolescence and maternal and child health indices. Alpha-value of 0.05 was used as the level of significance.

## RESULTS

The participants comprised 220 young mothers with a mean age of  $22.4 \pm 2.5$  years. Half of the participants were married before the age of 18 years (50.0%, n=110) and had been married for less than five years (50.5%, n=111). Many of the participants were muslim (92.3%), married (81.8%) and full time housewife (60.0%). About 13% were underweight and 20% were overweight or obese. Majority of the participants (78.2%) used public tap water, while 10.9% used borehole and 10% used open well water as source of their drinking water. Most of the participants (86.8%) used pit toilet, 9.5% used flush toilet and 3.2% has no toilet facility in their household. Details of the sociodemographic characteristics and socio-economic status of the participants are shown in Table 1

**Table 1: Sociodemographic characteristics and socioeconomic status of the participants**

| Variables                                            | n   | (%) |
|------------------------------------------------------|-----|-----|
| <b><u>Sociodemographic characteristics</u></b>       |     |     |
| <b>Age Group at marriage</b>                         |     |     |
| 12-17                                                | 110 | 50  |
| 18-25                                                | 110 | 50  |
| Age ( $22.36 \pm 2.5$ years)                         |     |     |
| <b>BMI Group (<math>\text{kg}/\text{m}^2</math>)</b> |     |     |

1  
2  
3  
4  
5  
6  
7  
8  
9  
10  
11  
12  
13  
14  
15  
16  
17  
18  
19  
20  
21  
22  
23  
24  
25  
26  
27  
28  
29  
30  
31  
32  
33  
34  
35  
36  
37  
38  
39  
40  
41  
42  
43  
44  
45  
46  
47  
48  
49  
50  
51  
52  
53  
54  
55  
56  
57  
58  
59  
60

|                                      |     |      |
|--------------------------------------|-----|------|
| Underweight                          | 29  | 13.2 |
| Normal                               | 147 | 66.8 |
| Overweight                           | 32  | 14.5 |
| Obese                                | 12  | 5.5  |
| BMI (22.37 ±4.0 Kg/m <sup>2</sup> )  |     |      |
| <b>Level of Education</b>            |     |      |
| None                                 | 33  | 15.0 |
| Quranic                              | 102 | 46.4 |
| Primary                              | 30  | 13.6 |
| Secondary                            | 36  | 16.4 |
| Tertiary                             | 19  | 8.6  |
| <b>Occupation</b>                    |     |      |
| Farming                              | 11  | 5.0  |
| Trading                              | 67  | 30.5 |
| Civil Servant                        | 10  | 4.5  |
| House wife                           | 132 | 60.0 |
| <b>Religious Affiliation</b>         |     |      |
| Muslim                               | 203 | 92.3 |
| Christian                            | 17  | 7.7  |
| <b>Number of children born</b>       |     |      |
| One                                  | 79  | 35.9 |
| Two                                  | 68  | 30.9 |
| Three                                | 45  | 20.5 |
| ≥ Four                               | 28  | 12.7 |
| <b>Marital Status</b>                |     |      |
| Married                              | 180 | 81.8 |
| Not Married                          | 5   | 2.3  |
| Divorced                             | 27  | 12.3 |
| Widowed                              | 8   | 3.6  |
| <b>Duration of Marriage (years)*</b> |     |      |
| Less than Five                       | 111 | 50.5 |
| Five to Nine                         | 108 | 49.1 |
| <b>Socioeconomic Status</b>          |     |      |
| <b>Source of Drinking Water</b>      |     |      |
| Borehole into Dwelling               | 24  | 10.9 |
| Public Tap                           | 172 | 78.2 |
| Open Well                            | 22  | 10.0 |
| Surface Water                        | 1   | 0.5  |
| <b>Type of Toilet Facilities</b>     |     |      |
| Flush Toilet                         | 21  | 9.5  |
| Pit Toilet                           | 191 | 86.8 |
| No Facility                          | 7   | 3.2  |
| <b>Cooking Facilities</b>            |     |      |
| Gas                                  | 7   | 3.2  |
| Kerosene                             | 20  | 9.1  |

|                               |          |     |      |
|-------------------------------|----------|-----|------|
|                               | Charcoal | 146 | 66.4 |
|                               | Firewood | 47  | 21.4 |
| <b>Do you have a car/bus?</b> |          |     |      |
|                               | Yes      | 14  | 6.4  |
|                               | No       | 205 | 93.2 |

\* values do not add up to 220 due to missing data

Table 2 shows the marriage and pregnancy history of the participants. While majority of the participants (68.6%) reported they took decision to get married with their partners, 26.4% responded their marriage were decided by their parents and a few (5%) reported their decision to get married was made by others. Majority of the participants (82.3%) had never discussed family planning with their spouses and a substantial number of the mothers (22.3%) had never attended ante natal care. About 45% of the participants had experienced prolonged labour and 21.4% had history of miscarriage and few (19.1%) had a history of stillbirth. Almost half (45.5%) delivered their babies in the hospital and were attended to by nurses. Those who were attended to by doctors were 9.1%, those by midwives were 20.5% and those who were delivered at home by traditional birth attendant were 25.0%.

**Table 2: Participants' marriage and pregnancy history**

| Variables                            | n   | (%)  |
|--------------------------------------|-----|------|
| <b>Decision to marry</b>             |     |      |
| Both partners                        | 151 | 68.6 |
| Parents                              | 58  | 26.4 |
| Others                               | 11  | 5.0  |
| <b>Domestic violence</b>             |     |      |
| Yes                                  | 45  | 20.5 |
| No                                   | 175 | 79.5 |
| <b>Discussion on family planning</b> |     |      |
| Yes                                  | 39  | 17.7 |
| No                                   | 181 | 82.3 |
| <b>Ante-natal</b>                    |     |      |
| Yes                                  | 171 | 77.7 |
| No                                   | 49  | 22.3 |
| <b>Prolonged labour</b>              |     |      |
| Yes                                  | 99  | 45.0 |
| No                                   | 121 | 55.0 |
| <b>Miscarriage</b>                   |     |      |
| Yes                                  | 47  | 21.4 |

|                         |                             |     |      |
|-------------------------|-----------------------------|-----|------|
|                         | No                          | 173 | 78.6 |
| <b>Stillbirth</b>       | Yes                         | 42  | 19.1 |
|                         | No                          | 178 | 80.9 |
| <b>Birth Attendance</b> | Doctor                      | 20  | 9.1  |
|                         | Nurse                       | 100 | 45.5 |
|                         | Midwife                     | 45  | 20.5 |
|                         | Traditional birth attendant | 55  | 25.0 |

n = frequency, % =percentage

Table 3 shows the difference in prevalence of maternal and child health indices between adolescent and adult mothers. Respondents who commenced childbearing between 12-17 years of age experienced at least one pregnancy or birth related health problem and their children had more health concerns than those who commenced childbearing above 17 years. A substantial number of those that commenced child bearing early reported having fistula (22% vs 0.0%) and had higher prevalence of sexually transmitted infection (38% vs 5%) when compared to adult mothers ( $P < 0.001$ ). Postpartum hemorrhage (59% vs 13%,  $P < 0.001$ ) and eclampsia (20% vs 8%,  $P = 0.02$ ) were more prevalent among adolescent mothers than among adult mothers. Just as for maternal health indices, all child health indices such as child infections (21% vs 10%,  $P = 0.04$ ), child loss within 5 years (21% vs 7%,  $P = 0.006$ ) and low child birth weight (55% vs 29%,  $P < 0.001$ ) were more frequently reported for children of adolescent mothers when compared to children of the adult mothers.

**Table 3: Chi-square statistics for difference in the prevalence of maternal and child health indices between adolescent mothers and non-adolescent mothers**

| Variables                    | Motherhood Description |             |               |             | $\chi^2$ | P-value   |
|------------------------------|------------------------|-------------|---------------|-------------|----------|-----------|
|                              | Adolescent mothers     |             | Adult mothers |             |          |           |
|                              | Yes<br>n (%)           | No<br>n (%) | Yes<br>n (%)  | No<br>n (%) |          |           |
| Presence of fistula          | 24 (22.0)              | 86 (78.0)   | 0 (0.0)       | 110 (100.0) | 26.939   | <0.001**  |
| Sexual transmitted infection | 42 (38.0)              | 68 (62.0)   | 6 (5.0)       | 104 (95.0)  | 34.535   | <0.001**  |
| Post-partum hemorrhage       | 65 (59.0)              | 45 (41.0)   | 14 (13.0)     | 96 (87.0)   | 51.371   | < 0.001** |

|                          |           |           |           |            |       |         |
|--------------------------|-----------|-----------|-----------|------------|-------|---------|
| Eclampsia                | 22 (20.0) | 88 (80.0) | 9 (8.0)   | 101 (92.0) | 6.346 | 0.02*   |
| Child infectious illness | 23 (21.0) | 86 (78.0) | 11 (10.0) | 98 (89.0)  | 5.018 | 0.04*   |
| Child lost in 5years     | 23 (21.0) | 86 (78.0) | 8 (7.0)   | 100 (91.0) | 8.307 | 0.006*  |
| Normal child weight      | 49 (45.0) | 61 (55.0) | 78 (71.0) | 32 (29.0)  | 15.67 | <0.001* |

\*-Significant at 0.05

Table 4 shows the association of motherhood in adolescence with maternal and child health indices. Adolescent mothers were about 5 times more likely to experience fistula (OR=5.01, 95%CI=3.01-14.27), more than 6 times likely to have postpartum hemorrhage (OR=6.83, 95%CI=2.93-15.92) and sexually transmitted infections (OR=6.29, 95%CI=2.26-17.51), and more than 3 times likely to lose a child within 5 years of birth (OR=3.52, 95%CI=1.07-11.60), than adult mothers. Children born to adolescent mothers were 66% less likely to have a normal weight at birth (OR=0.34, 95%CI=0.15-0.73) than those born to adult mothers.

**Table 4: Association of adolescent motherhood with maternal and child health indices**

| Variables                           | Adolescent mothers (12-17 years old) |                    |
|-------------------------------------|--------------------------------------|--------------------|
|                                     | Unadj O.R (95% CI)                   | Adj† O.R (95% CI)  |
| <b>Presence of fistula</b>          |                                      |                    |
| No                                  | 1.00                                 | 1.00               |
| Yes                                 | 9.18 (0.00)                          | 5.01 (3.01-14.27)* |
| <b>Sexual transmitted infection</b> |                                      |                    |
| No                                  | 1.00                                 | 1.00               |
| Yes                                 | 7.24 (2.41-21.70)*                   | 6.29(2.26-17.51)*  |
| <b>Presence of eclampsia</b>        |                                      |                    |
| No                                  | 1.00                                 | 1.00               |
| Yes                                 | 2.20 (0.68-7.03)                     | 2.17 (0.70-6.68)   |
| <b>Postpartum hemorrhage</b>        |                                      |                    |
| No                                  | 1.00                                 | 1.00               |
| Yes                                 | 8.19 (3.73-17.97)*                   | 6.83 (2.93-15.92)* |
| <b>Child infectious illness</b>     |                                      |                    |
| No                                  | 1.00                                 | 1.00               |
| Yes                                 | 0.96 (0.33-2.78)                     | 1.20 (0.44- 3.29)  |
| <b>Child lost in 5 years</b>        |                                      |                    |

|                                     |                    |                   |
|-------------------------------------|--------------------|-------------------|
| No                                  | 1.00               | 1.00              |
| Yes                                 | 3.52 (1.07-11.60)* | 2.30 (0.74-7.15)  |
| <b>Normal child weight at birth</b> |                    |                   |
| No                                  | 1.00               | 1.00              |
| Yes                                 | 0.39 (0.17-0.89)*  | 0.34 (0.15-0.73)* |

Adj= Adjusted, Unadj= Unadjusted, OR= Odd Ratio, CI =Confidence Interval

†= Odd Ratio adjusted for participants' sociodemographic characteristics, socioeconomic status and marriage and pregnancy characteristic. \*-Significant at 0.05

## DISCUSSION

Early marriage practices in the developing African countries is a global health problem and periodic evaluation of its impacts on population health status is important to assessing progress in this context. In this study, adolescent mothers aged 12-17 years in this study reported higher maternal morbidity and child morbidity and mortality indices than adult mothers. Our finding of higher likelihood (more than 5 times) of experiencing fistula among adolescent mothers compared to their adult counterparts is similar to the findings of Melo *et al.*, in Brazil which reported that adolescent mothers are about 8 times more likely to experience fistula than adult mothers.<sup>19</sup> Also, the finding that a substantial proportion of adolescent mothers had obstetric fistula in the present study is comparable to previous studies that 26% and 20% of minor mothers had experienced vesico and recto vaginal fistula in Adamawa, Nigeria and Ethiopia, respectively.<sup>15,20</sup>

In the present study, adolescent mothers tended to report sexually transmitted infection more frequently (38%) than mothers who married at the age of 18 and above. This finding is consistent with reports from Kenya and Zambia that teenage mothers have high rate (39%) of sexually transmitted infection.<sup>21</sup> Moreover, our finding that adolescent mothers were more than 6 times likely to have sexually transmitted infection than their adult counterparts is consistent with a previous Nigerian study which found that teenage mothers were 6.7 times likely to experience sexually transmitted infection than their adult counterparts.<sup>15</sup>

In contrast to previous studies from Ethiopia and Nigeria that found lower postpartum hemorrhage rate (17.2% and 19%, respectively) among adolescent mothers,<sup>15,20</sup> postpartum hemorrhage was more frequently (59.0%) reported by adolescent mothers in the present study. However, our finding that adolescent mothers were 6 times more likely to experience post-

partum hemorrhage compared to adult mothers is consistent with the finding in Ethiopia that adolescent mothers were about 4 times more likely to report postpartum hemorrhage.<sup>20</sup> Although the prevalence of eclampsia was higher among adolescent mothers and they were about twice more likely to have eclampsia than their adult mothers counterparts in the present study, we did not find association between motherhood in adolescence and eclampsia. This finding was somewhat contrary to that of an hospital based study in Nigeria that reported significant association between patients' relative perception of early marriage and eclampsia.<sup>22</sup>

Adolescent mothers tended to report child infectious illness more frequently than their adult counterparts in the present study. This finding is at variance with a previous Indian study that no proportional difference in the occurrence of child respiratory infection and diarrhea between minor mothers and non-minor ones.<sup>18</sup> However, our finding that adolescents mothers were 1.2 times likely to have children with infectious illness than the adult mothers is consistent with the Indian study which found adolescent mothers were 1.3 times likely to have child infectious illness than the adult mothers.<sup>18</sup> Also, consistent with the findings of Raj *et al.*, in which Indian adolescent mothers were 2.5 times more likely to experience the loss of an infant or child,<sup>18</sup> we found the 2 times higher likelihood of child loss within 5 years among adolescent mothers compared to their adult counterparts. Also our finding that children born to adolescent mothers were less likely to have a normal weight baby at birth than those born to adult mothers is consistent with previous findings that children of adolescent mothers in India and Brazil were more likely to have low birth weight when compared to their adult mother counterparts.<sup>18,19</sup>

Generally, the findings of the present study have practical implications for population health in Maiduguri and Nigeria. Public health professionals, including physiotherapists in health promotion, can use the evidence to develop educational programmes and campaign to improve awareness on the health consequences of early motherhood. For instance, parents and community and religious leaders could be sensitized that early marriage and motherhood during adolescence is a risk factor for multiple negative maternal and child health indices such as eclampsia, fistula, sexually transmitted infection, postpartum hemorrhage and infant morbidity and mortality. With this evidence, traditional and religious leaders, long recognized as key partners to ending the harmful practice of child marriage in Africa,<sup>23</sup> can be appropriately mobilized and their support enlisted towards delaying girls marriage till full maturity. Moreover, the findings could provide factual tools for policy makers, responsible for health planning and funding, to improve maternal

1  
2  
3 and child health indices in Maiduguri. Scarce evidence-based information such as this is needed  
4 to enhance effective and targeted interventions to improve maternal and child health in a most  
5 economically disadvantaged and medically underserved region of Nigeria. Until now, only one  
6 study provided empirical data on the impact of early marriage practices in a small town in  
7 northeastern Nigeria.<sup>15</sup> Therefore, more community based epidemiological studies are needed to  
8 fully understand the impact of early marriage on child and maternal health in this disadvantaged  
9 region of Nigeria.  
10  
11  
12  
13  
14

15 Our study has some important limitations that should be considered when interpreting the  
16 findings. First, the study adopted a cross-sectional design, in which causality between  
17 motherhood in adolescence and maternal and child health indices cannot be inferred. Second, the  
18 maternal and child health consequences explored in the present study is presented in child  
19 mortality and morbidity counts and prevalence only. The cost of care and burden of diseases due  
20 to early marriage have not been analysed in pecuniary terms, neither has this cost been compared  
21 with cost of care for adult mothers. Third, the study involved a convenience sample of urban  
22 living mothers in a metropolitan city. Thus, the findings may not generalize to other samples  
23 with different demographics in the Nigerian society. The small sample size of the present study  
24 is also a limitation regarding its generalizability to the entire Maiduguri population itself.  
25 However, the findings of this preliminary study suggest that motherhood in adolescence is a  
26 potential risk factor to some adverse maternal and child health indices. In order to better estimate  
27 the impact of early marriage and motherhood on maternal and child morbidity for Nigeria or  
28 identify any pattern to the disease burden, there is the need for an expanded survey at a regional  
29 or national scale to include the rural population in Nigeria.  
30  
31  
32  
33  
34  
35  
36  
37  
38  
39  
40  
41  
42

### 43 **Conclusion**

44 Adolescent motherhood was associated with negative maternal and child health indices  
45 among urban dwelling mothers in Maiduguri city. The findings suggest the need for community  
46 health promotion and public health interventions to improve maternal and child health among  
47 early married mothers in Maiduguri, Nigeria. However, for effective population wide public  
48 health actions to improve maternal and child health in Nigeria, future studies are needed to  
49 confirm this evidence at the regional or national level including the rural population in Nigeria.  
50  
51  
52  
53  
54  
55  
56  
57  
58  
59  
60



1  
2  
3 **Contributors:** ALO, SUA, FS, AAU, AMJ and AYO were involved in the design of the study.  
4 SUA, FS, AMJ and AYO led the data collection. SUA, FS and AYO led data cleaning and data  
5 analysis. ALO contributed to data analysis and interpretation. ALO and AYO wrote the  
6 manuscript. SUA and AAU revised the drafted manuscript. All authors provided input in the  
7 revision and gave approval of the final manuscript.  
8  
9  
10  
11  
12

13 **Funding:** None.  
14  
15

16 **Competing interests:** None declared.  
17  
18

19 **Patient consent:** Participants consent obtained.  
20  
21  
22

23 **Ethics approval:** This study was reviewed and approved by the ethical committee of the  
24 University of Maiduguri Teaching Hospital, Maiduguri, Nigeria  
25  
26  
27

28 **Data sharing statement:** No additional data are available.  
29  
30  
31

## 32 REFERENCES 33

- 34 1. United Nations Children's Fund. *Early Marriage: A Harmful Traditional Practice*. A  
35 Statistical Exploration. New York: UNICEF, 2005.  
36 [https://www.unicef.org/publications/index\\_26024.html](https://www.unicef.org/publications/index_26024.html) (accessed 12 March 2018).  
37  
38
- 39 2. Parsons J, Edmeades J, Kes A, Petroni S, Sexton M, Wodon Q. Economic impacts of  
40 child marriage: A review of the literature. *The Review of Faith & International Affairs*  
41 2015;13(3):12-22, DOI: 10.1080/15570274.2015.1075757  
42  
43
- 44 3. United Nations Population Fund-United Nations Children's Fund. *Global programme to*  
45 *accelerate action to end child marriage. Progress report 2016*. UNFPA-UNICEF, 2017.  
46 <https://www.unicef.org/protection/files/ChildMarriage-Global-DonorReport-v7.pdf>  
47 (accessed 12 March 2018).  
48  
49
- 50 4. United Nations Children's Fund, *Accelerating Efforts to Eliminate Child Marriage in*  
51 *Africa*. New York: UNICEF, 2017  
52  
53  
54  
55  
56  
57  
58  
59  
60

- 1  
2  
3 [https://www.unicef.org/protection/files/Child\\_Marriage\\_Brochure\\_2017.pdf](https://www.unicef.org/protection/files/Child_Marriage_Brochure_2017.pdf) (accessed 12  
4 March 2018).  
5  
6  
7 5. United Nations Children's Fund. *Ending Child Marriage: Progress and prospects*. New  
8 York: UNICEF, 2014. [https://data.unicef.org/resources/ending-child-marriage-progress-](https://data.unicef.org/resources/ending-child-marriage-progress-and-prospects/)  
9 [and-prospects/](https://data.unicef.org/resources/ending-child-marriage-progress-and-prospects/) (accessed 12 March 2018)  
10  
11  
12 6. World Health Organization. *Health for the world's adolescents: A second chance in the*  
13 *second decade*. Geneva: WHO, 2014.  
14  
15 [http://www.who.int/maternal\\_child\\_adolescent/topics/adolescence/second-decade/en/](http://www.who.int/maternal_child_adolescent/topics/adolescence/second-decade/en/)  
16 (accessed 12 March 2018).  
17  
18  
19 7. Nour NM. Health consequences of child marriage in Africa. *Emerg Infect Dis*  
20 2006;12(11):1644-9.  
21  
22 8. World Health Organization. *Obstetric Fistula. Guiding principles for clinical*  
23 *management and program development*. Geneva: World Health Press, 2006:  
24 [http://www.who.int/reproductivehealth/publications/maternal\\_perinatal\\_health/92415936](http://www.who.int/reproductivehealth/publications/maternal_perinatal_health/9241593679/en/)  
25 [79/en/](http://www.who.int/reproductivehealth/publications/maternal_perinatal_health/9241593679/en/) (accessed 12 March 2018).  
26  
27  
28  
29 9. Nour NM. Child marriage: A Silent and human rights issue. *Rev Obstet Gynecol* 2009;  
30 2(1): 51–56.  
31  
32  
33 10. World Health Organization. *Meeting to develop a global consensus on preconception*  
34 *care to reduce maternal and childhood mortality and morbidity*. Geneva: WHO, 2013.  
35  
36  
37 11. Say L, Raine R. A systematic review of inequalities in the use of maternal health care in  
38 developing countries: examining the scale of the problem and the importance of context.  
39 *Bull World Health Organ* 2007;85(10):812–9.  
40  
41  
42 12. Langlois EV, Miszkurka M, Zunzunegui MV, Ghaffar A, Ziegler D, Karp I. Inequities in  
43 postnatal care in low- and middle-income countries: a systematic review and meta-  
44 analysis. *Bull World Health Organ* 2015;93:259-70  
45  
46  
47 13. Walker JA, Mukisa S, Hashim Y, Ismail H. *Mapping Early Marriage in West Africa: A*  
48 *Scan of Trends, Interventions, What Works, Best Practices, and the Way Forward*. Ford  
49 Foundation, 2013.  
50  
51  
52 14. Alkema L, Chou D, Hogan D, et al. Global, regional, and national levels and trends in  
53 maternal mortality between 1990 and 2015, with scenario-based projections to 2030: A  
54  
55  
56  
57  
58  
59  
60

- 1  
2  
3 systematic analysis by the UN Maternal Mortality Estimation Inter-Agency Group.  
4 *Lancet* 2016;387(10017):462–74.  
5  
6  
7 15. Adedokun O, Adeyemi O, Dauda C. Child marriage and maternal health risks among  
8 young mothers in Gombi, Adamawa State, Nigeria: Implications for mortality,  
9 entitlements and freedoms. *Afri Health Sci* 2016;16(4): 986-99.  
10  
11  
12 16. Federal Ministry of Health. *National Health Policy 2016: Promoting the Health of*  
13 *Nigerians to Accelerate Socioeconomic Development*. FMOH, September 2016  
14  
15  
16 17. Population City. Maiduguri population, 2018. <http://population.city/nigeria/maiduguri/>  
17 (accessed 03 March 2018)  
18  
19  
20 18. Melo EC, Ribeiro AB, de Oliveira RR, Zurita RC, Mathias TA. Analysis of maternal and  
21 child health indicators in an area at Parana State, Brazil. *Nurs Res Pract* 2013:495178.  
22 doi: 10.1155/2013/495178.  
23  
24  
25 19. Raj A, Saggurti N, Winter M, et al. The effect of maternal child marriage on morbidity  
26 and mortality of children under 5 in India: Cross sectional study of a nationally  
27 representative sample. *BMJ* 2010;340:b4258. doi:10.1136/bmj.b4258  
28  
29  
30 20. Pathfinder International Ethiopia. *Report on causes and consequences of early marriage*  
31 *in Amhara region*. Addis Ababa: Pathfinder International, 2006.  
32 [http://www.pathfinder.org/publications/causes-and-consequences-of-early-marriage-in-](http://www.pathfinder.org/publications/causes-and-consequences-of-early-marriage-in-the-amhara-region-of-ethiopia/)  
33 [the-amhara-region-of-ethiopia/](http://www.pathfinder.org/publications/causes-and-consequences-of-early-marriage-in-the-amhara-region-of-ethiopia/) (accessed 29 March 2018).  
34  
35  
36 21. International Women's Health Program. *Early Marriage*. The Society of Obstetricians  
37 and Gynaecologists of Canada. Web. 30 Apr. 2010.  
38 <http://iwhp.sogc.org/index.php?page=early-marriage> (accessed 01 April 2018)  
39  
40  
41 22. Adamu AN, Tunau KA, Hassan M, Ekele BA. The perception of patients' relations on  
42 the cause of eclampsia. *Gynecol Obstet (Sunnyvale)* 4: 205. doi:10.4172/2161-  
43 0932.1000205  
44  
45  
46 23. African Union. *Campaign to end child marriage in Africa. The Effects of Traditional and*  
47 *Religious Practices of Child Marriage on Africa's Socio-Economic Development*. A  
48 Review of Research, Reports and Toolkits from Africa, 2015.  
49 [https://au.int/sites/default/files/documents/31018-doc-5465\\_ccmc\\_africa\\_report.pdf](https://au.int/sites/default/files/documents/31018-doc-5465_ccmc_africa_report.pdf)  
50 (accessed 01 April 2018)  
51  
52  
53  
54  
55  
56  
57  
58  
59  
60

# BMJ Open

## Association between adolescent motherhood and maternal and child health indices: A community-based study in Maiduguri, Nigeria

|                                 |                                                                                                                                                                                                                                                                                                                                                                                                                                                                                                        |
|---------------------------------|--------------------------------------------------------------------------------------------------------------------------------------------------------------------------------------------------------------------------------------------------------------------------------------------------------------------------------------------------------------------------------------------------------------------------------------------------------------------------------------------------------|
| Journal:                        | <i>BMJ Open</i>                                                                                                                                                                                                                                                                                                                                                                                                                                                                                        |
| Manuscript ID                   | bmjopen-2018-024017.R1                                                                                                                                                                                                                                                                                                                                                                                                                                                                                 |
| Article Type:                   | Research                                                                                                                                                                                                                                                                                                                                                                                                                                                                                               |
| Date Submitted by the Author:   | 13-Nov-2018                                                                                                                                                                                                                                                                                                                                                                                                                                                                                            |
| Complete List of Authors:       | Oyeyemi, Adewale; University of Maiduguri Medical College, Physiotherapy<br>Aliyu, Salamatu; University of Maiduguri Medical College, Physiotherapy<br>Sa'ad, Fatima; Neuropsychiatric Hospital Maiduguri, Physiotherapy<br>Rufa'i, Adamu; University of Maiduguri, Physiotherapy; Universiti Sains Malaysia, School of Health Sciences<br>Jajere, AbdulRahman; University of Maiduguri Teaching Hospital, Physiotherapy<br>Oyeyemi, Adetoyeje; University of Maiduguri Medical College, Physiotherapy |
| <b>Primary Subject Heading</b>: | Public health                                                                                                                                                                                                                                                                                                                                                                                                                                                                                          |
| Secondary Subject Heading:      | Paediatrics, Obstetrics and gynaecology, Public health                                                                                                                                                                                                                                                                                                                                                                                                                                                 |
| Keywords:                       | OBSTETRICS, Public health < INFECTIOUS DISEASES, Community gynaecology < GYNAECOLOGY, PRIMARY CARE                                                                                                                                                                                                                                                                                                                                                                                                     |
|                                 |                                                                                                                                                                                                                                                                                                                                                                                                                                                                                                        |

SCHOLARONE™  
Manuscripts

1  
2  
3 **Association between adolescent motherhood and maternal and child health indices: A**  
4 **community-based study in Maiduguri, Nigeria**  
5

6  
7 Adewale L Oyeyemi,<sup>1</sup> Salamatu U Aliyu,<sup>1</sup> Fatima Sa'ad,<sup>2</sup> Adamu A Rufai,<sup>1</sup>  
8 Abdulrahman M Jajere,<sup>3</sup> Adetoyeje Y Oyeyemi<sup>3\*</sup>  
9

10  
11  
12 <sup>1</sup>Department of Medical Rehabilitation (Physiotherapy), University of Maiduguri, Maiduguri,  
13 Borno State, Nigeria.  
14

15  
16 <sup>2</sup>Department of Physiotherapy, Neuropsychiatric Hospital, Maiduguri, Borno State, Nigeria.  
17

18  
19 <sup>3</sup>Department of Physiotherapy, University of Maiduguri Teaching Hospital, Maiduguri, Borno  
20 State, Nigeria.  
21

22  
23  
24  
25  
26  
27  
28 -----  
29

30  
31 **Corresponding Author**

32 Dr. Adetoyeje Y. Oyeyemi, Department of Medical Rehabilitation (Physiotherapy), University of  
33 Maiduguri, Maiduguri, Borno State, Nigeria; E-mail: adeoyeyemi@aol.com  
34  
35  
36  
37  
38  
39  
40  
41  
42  
43  
44  
45  
46  
47  
48  
49  
50  
51  
52  
53  
54  
55  
56  
57  
58  
59  
60

## ABSTRACT

**Introduction:** Adolescent motherhood (child bearing below 18 years of age) is a major global health and social problem. Understanding the impact of early motherhood on maternal and child health indices is important to community and population health promotion in developing countries. This study examined the associations between adolescent motherhood and maternal and child health indices in Maiduguri, Nigeria.

**Methods:** A cross-sectional design method was used to recruit 220 mothers (age= 12 – 25 years) from four communities in the city of Maiduguri, Northeastern Nigeria. Participants were surveyed using a self-developed interviewer administered questionnaire consisting of two parts. Part I elicited socio-demographic characteristics while part II consisted of items assessing maternal and child health indices. Logistic regression analysis was used to compute adjusted odd ratios (OR) and 95% confidence interval (95%CI) of the associations between motherhood in adolescence (mothers below 18 years old) and maternal and child health indices.

**Results:** Adolescent mothers were more likely to experience fistula (OR=5.01, 95%CI=3.01-14.27), to have postpartum hemorrhage (OR=6.83, 95%CI=2.93-15.92), to have sexually transmitted infections (OR=6.29, 95%CI=2.26-17.51) and to lose a child within 5 years of birth (OR=3.52, 95%CI=1.07-11.60), compared to adult mothers. Children born to adolescent mothers were less likely to have normal weight at birth (OR=0.34, CI=0.15-0.73) than those born to adult mothers.

**Conclusion:** Adolescent motherhood was associated with negative maternal and child health indices. The findings suggest that community health promotion and public health interventions should focus on improving maternal and child health indices among adolescent mothers in Maiduguri, Nigeria. The findings can be used to inform effective primary health care practice and public health campaign to improve maternal and child health indices in Maiduguri, Nigeria. However, future studies are needed to confirm this evidence at the regional or national level including the rural population in Nigeria.

**Keywords:** Adolescent pregnancy, early marriage, teenage mothers, maternal health, adverse child health outcomes

### Strengths and limitations of this study

- This is one of the few community-based studies to assess the impact of early marriage and adolescent motherhood on maternal and child health indices in Nigeria
- The study utilized equal sample of early married and non-early married mothers to make the result more robust
- Evidence from the data can be used to inform effective primary health care practice and public health campaign to improve maternal and child health indices among early married mothers in the medically underserved and economically disadvantaged Northeast region of Nigeria
- The study involved a convenience sample of urban community dwelling mothers, so findings may not generalize to other samples with different characteristics in Nigeria
- Causality between adolescent motherhood and maternal and child health indices cannot be inferred due to the cross-sectional design nature of the study

## INTRODUCTION

Adolescent motherhood is an important social and public health problem.<sup>1</sup> It is a common consequence of early marriage, that has been defined as a formal marriage or informal union entered into by an individual before reaching the age of 18 years.<sup>2,3</sup> Worldwide, approximately 750 million girls and women were married before the age of 18.<sup>4</sup> In the developing countries, about 16 million adolescent mothers aged 15 to 19 years and 2.5 million girls under 16 years give birth each year.<sup>1</sup> Across Africa, 125 million girls and women alive today were married, with attendant pregnancies, before their 18th birthday.<sup>5</sup> This practice is most common in West and Central Africa where more than 4 in 10 girls were married before age 18, and about 1 in 7 were married or in union before age 15.<sup>4</sup> Underage-brides are often likely to be forced into sexual activities and commence child bearing early and are therefore at higher risks of death from complications of pregnancy and child birth.<sup>1,2,6</sup> They are also at risk for developing health complications arising from early pregnancy that includes; heavy bleeding, sexually transmitted infections, eclampsia, obstructed labour and obstetric fistula, all due to physical and sexual immaturity.<sup>6,7,8</sup> Moreover, due to adolescents' physiological and social immaturity and their lack of adequate prenatal care, health risks associated with pregnancies and childbearing are more pronounced among them than among older women.<sup>1,9</sup>

High death rates among adolescent mothers are usually due to eclampsia, postpartum hemorrhage, sepsis, HIV infection, malaria, and obstructed labor.<sup>9</sup> In developing countries, these problems may occur as a result of lack of preconception care that include education, health promotion, screening and other interventions among women of reproductive age.<sup>10</sup> Another factor is lack of access to postnatal care which include intervention to facilitate speedy recovery after birth, and to address concerns about newborn care, nutrition, breastfeeding, and family planning.<sup>11,12</sup> In most African countries, many of the problems associated with childbearing are also partly attributed to lack of timely and appropriate health care attention during pregnancy.<sup>7</sup> Adolescent mothers are more susceptible to anemia than adults and this greatly increases the risk and complications linked to pregnancy,<sup>7</sup> especially with the added pressure to prove their fertility in the first year of marriage as is the cultural practice in many developing countries.<sup>3,6,9</sup>



1  
2  
3 Child bearing during adolescence is not only a risk factor for adverse maternal health  
4 outcomes, but also has negative impacts on child health indices and the future well-being of the  
5 infants.<sup>1</sup> Previous studies have documented associations between adolescent births and increased  
6 incidence of negative perinatal and child health outcomes, such as preterm delivery, low birth  
7 weight and perinatal death.<sup>13-16</sup> Recent evidence from a study involving 45 low-and middle-  
8 income countries found the risk of neonatal mortality in all regions, including Africa, to be  
9 markedly greater for infants with adolescent mothers and suggested reducing adolescent births as an  
10 important strategy for addressing the problem of neonatal mortality in the developing countries.<sup>17</sup>  
11 In addition, a large multi-country study that included data from African countries reported higher  
12 risks of low birthweight, preterm delivery and severe neonatal conditions, and an increased risk of  
13 intra-hospital early neonatal mortality among infants born to adolescent mothers compared with  
14 adult mothers.<sup>18</sup>

15  
16  
17  
18  
19  
20  
21  
22  
23  
24 In Nigeria, adolescent motherhood is believed to be rampant because an estimated 28.7% of  
25 girls (absolute number=2,470,183) were married before the age of 18 years as of 2010.<sup>19</sup> This  
26 prevalence is expected to double by 2050 and Nigeria is expected to have the largest absolute  
27 number of child bride in the coming decades.<sup>5</sup> Although, Nigeria contributes to 1 in 5 and 1 in 4 of  
28 the global and regional maternal deaths,<sup>20</sup> respectively, yet there is paucity of evidence on the  
29 impact of adolescent motherhood on maternal and child health indices in Nigeria. Therefore, to  
30 enhance effective maternal and child health interventions in the vulnerable population subgroups, it  
31 is important to understand the impact of child marriage on maternal and child health in Nigeria. A  
32 recent study in North east Nigeria reported high maternal morbidity through various pregnancy  
33 complications among residents of Gombi, a town in Adamawa State.<sup>21</sup> However, until now, there is  
34 no report on the impact of adolescent motherhood on maternal and child health indices in  
35 Maiduguri, Borno State of Nigeria.

36  
37  
38  
39  
40  
41  
42  
43  
44  
45 Maiduguri city is the origin of a religious uprising which started in 2009 and became  
46 escalated to an armed insurgency in the northeastern Nigeria which continues until 2016 when the  
47 insurgency activities within the city became degraded. This city however houses Internally  
48 Displaced Persons including adolescent mothers, in several camps up till now. The present study  
49 aimed to examine the associations between motherhood in adolescence (mothers below 18 years  
50 old) and maternal and child health indices in Maiduguri, Nigeria. This is a preliminary attempt to  
51 provide insights into the impact of early marriage on population health in the most economically  
52  
53  
54  
55  
56  
57  
58  
59  
60

1  
2  
3 disadvantaged and medically underserved region of Nigeria. In the present study, the terms  
4 adolescent mothers, teenage brides and minor mothers are used interchangeably to describe  
5 adolescent girls who were married before the age of 18 years.  
6  
7

## 8 9 **METHODS**

### 10 11 **Setting, design and participants**

12  
13  
14 The study was conducted in Maiduguri which is the capital city of Borno State and the  
15 commercial center of the north eastern geopolitical zone of Nigeria. This zone comprising of six  
16 states including Yobe, Adamawa, Taraba, Bauchi, Gombe and the Borno States, is considered to be  
17 economically disadvantaged with least manpower resources and is also the most medically  
18 underserved zone in Nigeria.<sup>22</sup> The city of Maiduguri has an estimated population of 1.2 million  
19 people.<sup>23</sup>  
20  
21  
22  
23  
24

25  
26 The study adopted a cross-sectional survey design. The participants were 220 young mothers  
27 (aged = 12 - 25 years) recruited from their various households in *Gwange, Bulunkutu, Lamisula* and  
28 *Kofa biyu* communities (wards) of Maiduguri city. The age range of the mothers was based on  
29 definitions from previous studies on the same topic.<sup>18,21</sup> Sample size was calculated with the  
30 Cohen's formula:  $n = \frac{2(Z_1 + Z_2)^2}{d^2}$ , using a modest effect size statistic [ $d = 0.40$ ].<sup>24</sup> We  
31 determined that 192 participants (96 each per group for adolescent and adult mothers) were needed  
32 to detect a moderate to large effect size with more than 80% power at 95% confidence interval. A  
33 three-stage approach was used to determine household and participants selection into the study. In  
34 stage one, four wards (communities) were randomly selected (ballot method) from the available 15  
35 communities in Maiduguri.<sup>25</sup> In the second stage, for convenient purpose, three streets each were  
36 randomly selected (ballot method) in each of the four communities. In stage three, houses and  
37 participants were selected using convenient sampling technique. From each of the selected houses,  
38 all mothers that met the inclusion criteria and were willing to participate were recruited into the  
39 study.  
40  
41  
42  
43  
44  
45  
46  
47  
48  
49

50  
51 The eligibility criteria for the study were (1) being a mother between the ages of 12 and 25  
52 years, (2) having at least one child, (3) living within the identified community in the last 12 months,  
53 and (4) willing to be interviewed for a survey in English or Hausa language. Mothers that got  
54 married at the age of 26 years and above, those that were experiencing their first pregnancy and yet  
55  
56  
57  
58  
59  
60

1  
2  
3 to deliver a baby and mothers that married for more than 10 years were excluded from the study.  
4 Based on the preference of each participant, the survey interview was conducted by one of the  
5 researchers (FS) using either the English or Hausa language. The researcher who administered the  
6 survey was a native speaker of Hausa and also proficient in English language. Data collection was  
7 conducted between March and August, 2014 and all measurements were completed at the  
8 participants' home. All participants provided signed informed consent and the study was approved  
9 by the Ethics Committee of the University of Maiduguri Teaching Hospital.  
10  
11  
12  
13  
14  
15

### 16 **Patient and Public Involvement**

17  
18 Patients were not directly involved in the recruitment to and conduct of the study. However,  
19 authors are practicing physiotherapists two of whom (AJ) and AYO) carry caseloads that includes  
20 pediatric patients and mothers requiring obstetric and gynecological physiotherapy for more than  
21 10 years each on a consistent basis. Thus, the authors had long histories of interaction with  
22 adolescent and adult mothers. Since all authors reviewed the questionnaire, approved its use and  
23 attested to its content and face validity, it can be assumed that the development of the research  
24 questionnaire and the design of the study were informed by the priorities, preferences and  
25 experience of the adolescent and adult mothers and the public.  
26  
27  
28  
29  
30  
31  
32

### 33 **Instruments**

34  
35 For this cross-sectional survey study, socio-demographic form was used to collect  
36 information about the participant's characteristics. These include age, marital status, age at time of  
37 marriage, years of marriage, number of children ever born, level of formal education, occupation,  
38 religion, area of residence and socio-economic status. A structured questionnaire was developed  
39 from insights provided through previous studies.<sup>21,26,27</sup> The self-developed questionnaire was  
40 interviewer administered and contains 17 items that assess maternal and child health concerns (See  
41 Appendix). The questionnaire has two sections. Section A addresses maternal health indices while  
42 section B addresses child health indices. The respondents were asked series of questions such as  
43 'have you ever experience domestic violence', 'have you ever experienced pregnancy related  
44 complications', 'have you ever had sexually transmitted infections (STI)', 'was your child's weight at birth  
45 low', did the child suffer any infectious illness two weeks after birth', and 'was any child lost in the last five  
46 years'. The response to the questions was anchored on a dichotomous scale, (1) Yes or (2) No. The  
47 face and content validity of the questionnaire was evaluated by two experts who are specialists in  
48  
49  
50  
51  
52  
53  
54  
55  
56  
57  
58  
59  
60

1  
2  
3 obstetrics and gynecology and maternal and child health. These specialists have a combined  
4 experience of over 23 years and they attested to the face and content validity of the developed  
5 questionnaire. The participants' weight and height were measured following standardized  
6 procedure, using a bathroom weighing scale (HANA, China) and a locally fabricated wooden height  
7 meter that was calibrated, respectively. Body mass index (BMI) was calculated as body weight  
8 divided by the square of height ( $\text{kg}/\text{m}^2$ ), and participants were categorized as underweight ( $<18.5$   
9  $\text{kg}/\text{m}^2$ ), normal weight ( $18.5-24.9 \text{ kg}/\text{m}^2$ ), overweight ( $25.0-29.9 \text{ kg}/\text{m}^2$ ) and obese ( $\geq 30.0 \text{ kg}/\text{m}^2$ )  
10 according to the WHO guidelines.<sup>28</sup>  
11  
12  
13  
14  
15  
16  
17

### 18 **Data analyses**

19  
20 Analyses were conducted using the Statistical Package for the Social Science (SPSS)  
21 versions 18. Descriptive statistics of mean, standard deviation and percentages were used to  
22 summarize the participants' socio-demographic characteristics, socio-economic status and marriage  
23 and pregnancy history. Chi-square statistic was used to compare the prevalence of maternal  
24 (obstetric fistula, sexually transmitted disease, postpartum hemorrhage and eclampsia) and child  
25 (low birth weight, child infectious illness and child mortality) health indices between adolescent  
26 mothers (age= 12-17 years) and non-adolescent mothers (age= 18-25 years). Multivariate logistic  
27 regression analysis adjusted for participants' sociodemographic characteristics, socioeconomic  
28 status and marriage and pregnancy history was used to examine the associations between  
29 motherhood in adolescence and maternal and child health indices. All maternal and child health  
30 variables that were significant in the bivariate analysis (chi-square statistics) were included in the  
31 regression models. Alpha-value of 0.05 was used as the level of significance.  
32  
33  
34  
35  
36  
37  
38  
39  
40  
41

### 42 **RESULTS**

43  
44 The participants comprised 220 young mothers with a mean age of  $22.4 \pm 2.5$  years. Half of  
45 the participants were married before the age of 18 years (50.0%,  $n=110$ ) and had been married for  
46 less than five years (50.5%,  $n=111$ ). Many of the participants were muslim (92.3%), married  
47 (81.8%) and full-time housewife (60.0%). Compared to adult mothers ( $P < 0.05$ ), most adolescents  
48 mothers were underweight (75.9% vs 24.1%), had no education (75.8% vs 24.2%), had at least four  
49 or more children (96.4% vs 3.6%) and had been married for between five to nine years (68.5% vs  
50 31.5%). Majority of the participants (78.2%) used public tap water, while 10.9% used borehole and  
51  
52  
53  
54  
55  
56  
57  
58  
59  
60

10% used open well water as source of their drinking water. Most of the participants (86.8%) used pit toilet, 9.5% used flush toilet and 3.2% has no toilet facility in their household. Compared to adult mothers ( $P < 0.05$ ), few proportions of adolescent mothers had flush toilets in their homes (9.5% vs 90.5%) and none used gas in their homes for cooking (0.0% vs 100.0%) or had a car in their households (0.0% vs 100.0%). Details of the sociodemographic characteristics and socioeconomic status of the participants are shown in Table 1.

**Table 1: Sociodemographic characteristics and socioeconomic status of the participants**

| Variables                                      | Total sample<br>N= 220 | Adolescent Mothers<br>n=110 (50%) | Adult Mothers<br>n=110 (50%) | P-value† |
|------------------------------------------------|------------------------|-----------------------------------|------------------------------|----------|
| <b><u>Sociodemographic characteristics</u></b> |                        |                                   |                              |          |
| Age (Years)                                    | 22.36 ± 2.5            | 21.45 ± 2.9                       | 23.37 ± 1.6                  | <0.001*  |
| BMI (Kg/m <sup>2</sup> )                       | 22.37 ± 4.0            | 21.84 ± 4.1                       | 22.89 ± 3.8                  | 0.052    |
| <b>Weight Status (n, %)</b>                    |                        |                                   |                              |          |
| Underweight                                    | 29 (13.2)              | 22 (75.9)                         | 7 (24.1)                     | 0.029*   |
| Normal                                         | 147 (66.8)             | 68 (46.3)                         | 79 (53.7)                    |          |
| Overweight                                     | 32 (14.5)              | 15 (46.9)                         | 17 (53.1)                    |          |
| Obese                                          | 12 (5.5)               | 5 (41.7)                          | 7 (58.3)                     |          |
| <b>Level of Education (n, %)</b>               |                        |                                   |                              |          |
| None                                           | 33 (15.0)              | 25 (75.8)                         | 8 (24.3)                     | <0.001*  |
| Quranic                                        | 102 (46.4)             | 57 (55.9)                         | 45 (44.1)                    |          |
| Primary                                        | 30 (13.6)              | 15 (50)                           | 15 (50)                      |          |
| Secondary                                      | 36 (16.4)              | 11 (30.6)                         | 25 (69.4)                    |          |
| Tertiary                                       | 19 (8.6)               | 2 (10.5)                          | 17 (89.5)                    |          |
| <b>Occupation (n, %)</b>                       |                        |                                   |                              |          |
| Farming                                        | 11 (5.0)               | 6 (54.5)                          | 5 (45.5)                     | 0.281    |
| Trading                                        | 67 (30.5)              | 34 (50.7)                         | 33 (49.3)                    |          |
| Civil Servant                                  | 10 (4.5)               | 2 (20)                            | 8 (80)                       |          |
| House wife                                     | 132 (60.0)             | 68 (51.5)                         | 64 (48.5)                    |          |
| <b>Religious Affiliation (n, %)</b>            |                        |                                   |                              |          |
| Muslim                                         | 203 (92.3)             | 103 (50.7)                        | 100 (49.3)                   | 0.449    |
| Christian                                      | 17 (7.7)               | 7 (41.2)                          | 10 (58.8)                    |          |
| <b>Number of children born (n, %)</b>          |                        |                                   |                              |          |
| One                                            | 79 (35.9)              | 26 (32.9)                         | 53 (67.1)                    | <0.001*  |
| Two                                            | 68 (30.9)              | 29 (42.6)                         | 39 (57.4)                    |          |
| Three                                          | 45 (20.5)              | 28 (62.2)                         | 17 (37.8)                    |          |

|                                          |             |            |            |         |
|------------------------------------------|-------------|------------|------------|---------|
| ≥ Four                                   | 28 (12.7)   | 27 (96.4)  | 1 (3.6)    |         |
| <b>Marital Status (n, %)</b>             |             |            |            |         |
| Married                                  | 180 (81.8)  | 92 (51.1)  | 88 (48.9)  | 0.508   |
| Not Married                              | 5 (2.3)     | 2 (40)     | 3 (60)     |         |
| Divorced                                 | 27 (12.3)   | 14 (51.9)  | 13 (48.1)  |         |
| Widowed                                  | 8 (3.6)     | 2 (25)     | 6 (75)     |         |
| <b>Years of Marriage (n, %)^</b>         |             |            |            |         |
| Less than Five                           | 111 (50.5)  | 36 (32.4)  | 75 (67.6)  | <0.001* |
| Five to Nine                             | 108 (49.1)  | 74 (68.5)  | 34 (31.5)  |         |
| <b>Socioeconomic Status</b>              |             |            |            |         |
| <b>Source of Drinking Water (n, %)^</b>  |             |            |            |         |
| Borehole into Dwelling                   | 24 (10.9)   | 10 (41.7)  | 14 (58.3)  | 0.367   |
| Public Tap                               | 172 (78.2%) | 86 (50.0)  | 86 (50.0)  |         |
| Open Well                                | 22 (10.0)   | 14 (63.6)  | 8 (36.4)   |         |
| Surface Water                            | 1 (0.5)     | 0 (0.0)    | 1 (100.0)  |         |
| <b>Type of Toilet Facilities (n, %)^</b> |             |            |            |         |
| Flush Toilet                             | 21 (9.5)    | 2 (9.5)    | 19 (90.5)  | <0.001* |
| Pit Toilet                               | 191 (86.8)  | 105 (55.0) | 86 (45.0)  |         |
| No Facility                              | 7 (3.2)     | 3 (42.9)   | 4 (57.1)   |         |
| <b>Cooking Facilities (n, %)^</b>        |             |            |            |         |
| Gas                                      | 7 (3.2)     | 0 (0.0)    | 7 (100.0)  | 0.004*  |
| Kerosene                                 | 20 (9.1)    | 5 (25.0)   | 15 (75.0)  |         |
| Charcoal                                 | 146 (66.4)  | 79 (54.1)  | 67 (45.9)  |         |
| Firewood                                 | 47 (21.4%)  | 26 (55.3)  | 21 (44.7)  |         |
| <b>Household car/bus (n, %)^</b>         |             |            |            |         |
| Yes                                      | 14 (6.4)    | 0 (0.0)    | 14 (100.0) | <0.001* |
| No                                       | 205 (93.2)  | 109 (53.2) | 96 (46.8)  |         |

†- Values based on independent t-tests statistics for continuous variables and chi-Square Statistics for categorical variables; \*- Significant difference between group ( $P < 0.05$ ); ^- values do not add up to 220 due to missing data ; BMI- Body Mass Index

Table 2 shows the marriage and pregnancy history of the participants. While majority of the participants (68.6%) reported they took decision to get married with their partners, 26.4% responded their marriage were decided by their parents and a few (5%) reported their decision to get married was made by others. Majority of the participants (82.3%) had never discussed family planning with their spouses and a substantial number of the mothers (22.3%) had never attended ante natal care. About 45% of the participants had experienced prolonged labour and 21.4% had history of miscarriage and few (19.1%) had a history of stillbirth. Almost half (45.5%) delivered their babies in the hospital and were attended to by nurses. Those who were attended to by doctors

were 9.1%, those by midwives were 20.5% and those who were delivered at home by traditional birth attendant were 25.0%. Compared to adult mothers ( $P < 0.05$ ), most of the adolescent mothers had their marriage decided by their parents (62.1% vs 37.9%) or others (81.8% vs 18.25%), had experienced prolonged labour (73.7% vs 26.3%), had a history of miscarriage (68.1% vs 31.9%) and stillbirth (81.0% vs 19.0%) and had their babies delivered at home by traditional birth attendants (69.1% vs 30.9%). Significantly fewer number of adolescent mothers (20.5%) had ever discussed family planning with their spouses compared with adult mothers (79.5%).

**Table 2: Participants' marriage and pregnancy history**

| Variables                            | Total sample<br>n (%) | Adolescent mothers<br>n (%) | Adult mothers<br>n (%) | $\chi^2$ | P-values |
|--------------------------------------|-----------------------|-----------------------------|------------------------|----------|----------|
| <b>Decision to marry</b>             |                       |                             |                        |          |          |
| Both partners                        | 151 (68.6)            | 65 (43.0)                   | 86 (57.0)              | 10.754   | 0.005*   |
| Parents                              | 58 (26.4)             | 36 (62.1)                   | 22 (37.9)              |          |          |
| Others                               | 11 (5.0)              | 9 (81.8)                    | 2 (18.2)               |          |          |
| <b>Domestic violence</b>             |                       |                             |                        |          |          |
| Yes                                  | 45 (20.5)             | 27 (60)                     | 18 (40)                | 2.263    | 0.133    |
| No                                   | 175 (79.5)            | 83 (47.4)                   | 92 (52.6)              |          |          |
| <b>Discussion on family planning</b> |                       |                             |                        |          |          |
| Yes                                  | 39 (17.7)             | 8 (20.5)                    | 31 (79.5)              | 16.487   | <0.001*  |
| No                                   | 181 (82.3)            | 102 (56.4)                  | 79 (43.6)              |          |          |
| <b>Ante-natal</b>                    |                       |                             |                        |          |          |
| Yes                                  | 171 (77.7)            | 81 (47.4)                   | 90 (52.6)              | 2.127    | 0.145    |
| No                                   | 49 (22.3)             | 29 (59.2)                   | 20 (40.8)              |          |          |
| <b>Prolonged labour</b>              |                       |                             |                        |          |          |
| Yes                                  | 99 (45.0)             | 73 (73.7)                   | 26 (26.3)              | 40.569   | <0.001*  |
| No                                   | 121 (55.0)            | 37 (30.6)                   | 84 (69.4)              |          |          |
| <b>Miscarriage</b>                   |                       |                             |                        |          |          |
| Yes                                  | 47 (21.4)             | 32 (68.1)                   | 15 (31.9)              | 7.819    | 0.005*   |
| No                                   | 173 (78.6)            | 78 (45.1)                   | 95 (54.9)              |          |          |
| <b>Stillbirth</b>                    |                       |                             |                        |          |          |
| Yes                                  | 42 (19.1)             | 34 (81.0)                   | 8 (19.0)               | 19.893   | <0.001*  |
| No                                   | 178 (80.9)            | 76 (42.7)                   | 102 (57.3)             |          |          |
| <b>Birth Attendance</b>              |                       |                             |                        |          |          |
| Doctor                               | 20 (9.1)              | 7 (35.0)                    | 13 (65.0)              | 14.374   | 0.002*   |
| Nurse                                | 100 (45.5)            | 40 (40.0)                   | 60 (60.0)              |          |          |
| Midwife                              | 45 (20.5)             | 25 (55.6)                   | 20 (44.4)              |          |          |
| Traditional BA                       | 55 (25.0)             | 38 (69.1)                   | 17 (30.9)              |          |          |



n = frequency, % =percentage, BA = Birth Attendant, \*- Significant difference between group ( $P < 0.05$ )

Table 3 shows the difference in prevalence of maternal and child health indices between adolescent and adult mothers. Respondents who commenced childbearing between 12-17 years of age experienced at least one pregnancy or birth related health problem and their children had more health concerns than those who commenced childbearing above 17 years. A substantial number of those that commenced child bearing early reported having fistula (22% vs 0.0%) and had higher prevalence of sexually transmitted infection (38% vs 5%) when compared to adult mothers ( $P < 0.001$ ). Postpartum hemorrhage (59% vs 13%,  $P < 0.001$ ) and eclampsia (20% vs 8%,  $P = 0.02$ ) were more prevalent among adolescent mothers than among adult mothers. Just as for maternal health indices, all child health indices such as child infections (21% vs 10%,  $P = 0.04$ ), child loss within 5 years (21% vs 7%,  $P = 0.006$ ) and low child birth weight (55% vs 29%,  $P < 0.001$ ) were more frequently reported for children of adolescent mothers when compared to children of the adult mothers.

**Table 3: Chi-square statistics for difference in the prevalence of maternal and child health indices between adolescent mothers and non-adolescent mothers**

| Variables                    | Motherhood Description |             |               |             | $\chi^2$ | P-value   |
|------------------------------|------------------------|-------------|---------------|-------------|----------|-----------|
|                              | Adolescent mothers     |             | Adult mothers |             |          |           |
|                              | Yes<br>n (%)           | No<br>n (%) | Yes<br>n (%)  | No<br>n (%) |          |           |
| Presence of fistula          | 24 (22.0)              | 86 (78.0)   | 0 (0.0)       | 110 (100.0) | 26.939   | <0.001**  |
| Sexual transmitted infection | 42 (38.0)              | 68 (62.0)   | 6 (5.0)       | 104 (95.0)  | 34.535   | <0.001**  |
| Post-partum hemorrhage       | 65 (59.0)              | 45 (41.0)   | 14 (13.0)     | 96 (87.0)   | 51.371   | < 0.001** |
| Eclampsia                    | 22 (20.0)              | 88 (80.0)   | 9 (8.0)       | 101 (92.0)  | 6.346    | 0.020*    |
| Child infectious illness     | 23 (21.0)              | 86 (78.0)   | 11 (10.0)     | 98 (89.0)   | 5.018    | 0.040*    |



|                      |           |           |           |            |       |         |
|----------------------|-----------|-----------|-----------|------------|-------|---------|
| Child lost in 5years | 23 (21.0) | 86 (78.0) | 8 (7.0)   | 100 (91.0) | 8.307 | 0.006*  |
| Normal child weight  | 49 (45.0) | 61 (55.0) | 78 (71.0) | 32 (29.0)  | 15.67 | <0.001* |

\*- Significant difference between group ( $P < 0.05$ )

Table 4 shows the association of motherhood in adolescence with maternal and child health indices. Adolescent mothers were about 5 times more likely to experience fistula (OR=5.01, 95%CI=3.01-14.27), more than 6 times likely to have postpartum hemorrhage (OR=6.83, 95%CI=2.93-15.92) and sexually transmitted infections (OR=6.29, 95%CI=2.26-17.51), and more than 3 times likely to lose a child within 5 years of birth (OR=3.52, 95%CI=1.07-11.60), than adult mothers. Children born to adolescent mothers were 66% less likely to have a normal weight at birth (OR=0.34, 95%CI=0.15-0.73) than those born to adult mothers.

**Table 4: Association of adolescent motherhood with maternal and child health indices**

| Variables                           | Adolescent mothers (12-17 years old) |                    |
|-------------------------------------|--------------------------------------|--------------------|
|                                     | Unadj O.R (95% CI)                   | Adj† O.R (95% CI)  |
| <b>Presence of fistula</b>          |                                      |                    |
| No                                  | 1.00                                 | 1.00               |
| Yes                                 | 9.18 (0.00)                          | 5.01 (3.01-14.27)* |
| <b>Sexual transmitted infection</b> |                                      |                    |
| No                                  | 1.00                                 | 1.00               |
| Yes                                 | 7.24 (2.41-21.70)*                   | 6.29(2.26-17.51)*  |
| <b>Presence of eclampsia</b>        |                                      |                    |
| No                                  | 1.00                                 | 1.00               |
| Yes                                 | 2.20 (0.68-7.03)                     | 2.17 (0.70-6.68)   |
| <b>Postpartum hemorrhage</b>        |                                      |                    |
| No                                  | 1.00                                 | 1.00               |
| Yes                                 | 8.19 (3.73-17.97)*                   | 6.83 (2.93-15.92)* |
| <b>Child infectious illness</b>     |                                      |                    |
| No                                  | 1.00                                 | 1.00               |
| Yes                                 | 0.96 (0.33-2.78)                     | 1.20 (0.44- 3.29)  |
| <b>Child lost in 5 years</b>        |                                      |                    |

|     |                    |                  |
|-----|--------------------|------------------|
| No  | 1.00               | 1.00             |
| Yes | 3.52 (1.07-11.60)* | 2.30 (0.74-7.15) |

### Normal child weight at birth

|     |                   |                   |
|-----|-------------------|-------------------|
| No  | 1.00              | 1.00              |
| Yes | 0.39 (0.17-0.89)* | 0.34 (0.15-0.73)* |

Adj= Adjusted, Unadj= Unadjusted, OR= Odd Ratio, CI =Confidence Interval

†= Odd Ratio adjusted for participants' sociodemographic characteristics, socioeconomic status and marriage and pregnancy characteristic. \*-Significant at  $P < 0.05$ , Model fit: (Chi-Square = 113.182; df=7; -2 Log Likelihood = 184.867;  $R^2 = 0.564$ ;  $P < 0.001$ ).

## DISCUSSION

Adolescent motherhood in the developing African countries is a global health problem, and periodic evaluation of its impacts on population health status is important to assessing progress in this context. The main finding of the present study was that adolescent mothers aged 12-17 years reported higher maternal morbidity and child morbidity and mortality indices compared to adult mothers aged 18 years and above. Broadly, this finding from Nigeria supports the conclusions from multiple international literature that child bearing during adolescence is associated with adverse maternal, perinatal and child health indices.<sup>13-18</sup>

Our finding of higher likelihood (more than 5 times) of experiencing fistula among adolescent mothers compared to their adult counterparts is similar to the findings of Melo *et al.*, in Brazil which reported that adolescent mothers are about 8 times more likely to experience fistula than adult mothers.<sup>26</sup> Also, the finding that a substantial proportion of adolescent mothers had obstetric fistula in the present study is comparable to previous studies that 26% and 20% of minor mothers had experienced vesico and recto vaginal fistula in Adamawa, Nigeria and Ethiopia, respectively.<sup>21,29</sup>

In the present study, adolescent mothers tended to report sexually transmitted infection more frequently (38%) than mothers who married at the age of 18 and above. This finding is consistent with reports from Kenya and Zambia that teenage mothers have high rate (39%) of sexually transmitted infection.<sup>30</sup> Moreover, our finding that adolescent mothers were more than 6 times likely to have sexually transmitted infection than their adult counterparts is consistent with a

1  
2  
3 previous Nigerian study which found that teenage mothers were 6.7 times likely to experience  
4 sexually transmitted infection than their adult counterparts.<sup>21</sup>

5  
6 In contrast to previous studies from Ethiopia and Nigeria that found lower postpartum  
7 hemorrhage rate (17.2% and 19%, respectively) among adolescent mothers,<sup>21,29</sup> postpartum  
8 hemorrhage was more frequently (59.0%) reported by adolescent mothers in the present study.  
9  
10 However, our finding that adolescent mothers were 6 times more likely to experience post-partum  
11 hemorrhage compared to adult mothers is consistent with the finding in Ethiopia that adolescent  
12 mothers were about 4 times more likely to report postpartum hemorrhage.<sup>29</sup> Although the  
13 prevalence of eclampsia was higher among adolescent mothers and they were about twice more  
14 likely to have eclampsia than their adult mothers counterparts in the present study, we did not find  
15 association between motherhood in adolescence and eclampsia. This finding was somewhat  
16 contrary to that of an hospital based study in Nigeria that reported significant association between  
17 patients' relative perception of early marriage and eclampsia.<sup>31</sup>

18  
19 Adolescent mothers tended to report child infectious illness more frequently than their adult  
20 counterparts in the present study. This finding is at variance with a previous Indian study that no  
21 proportional difference in the occurrence of child respiratory infection and diarrhea between minor  
22 mothers and non-minor ones.<sup>27</sup> However, our finding that adolescents mothers were 1.2 times likely  
23 to have children with infectious illness than the adult mothers is consistent with the Indian study  
24 which found adolescent mothers were 1.3 times likely to have child infectious illness than the adult  
25 mothers.<sup>27</sup> Also, consistent with the findings of Raj *et al.*, in which Indian adolescent mothers were  
26 2.5 times more likely to experience the loss of an infant or child,<sup>27</sup> we found the 2 times higher  
27 likelihood of child loss within 5 years among adolescent mothers compared to their adult  
28 counterparts. Also, our finding that children born to adolescent mothers were less likely to have a  
29 normal weight baby at birth than those born to adult mothers is consistent with previous findings  
30 that children of adolescent mothers in India and Brazil were more likely to have low birth weight  
31 when compared to their adult mother counterparts.<sup>26,27</sup>

32  
33 Generally, the findings of the present study have practical implications for population health  
34 in Maiduguri and Nigeria. Public health professionals, including physiotherapists in health  
35 promotion and primary health care, can use the evidence to develop educational programmes and  
36 campaign to improve awareness on the health consequences of early motherhood. For instance,  
37 parents and community and religious leaders could be sensitized that early marriage and  
38  
39  
40  
41  
42  
43  
44  
45  
46  
47  
48  
49  
50  
51  
52  
53  
54  
55  
56  
57  
58  
59  
60

1  
2  
3 motherhood during adolescence is a risk factor for multiple negative maternal and child health  
4 indices such as eclampsia, fistula, sexually transmitted infection, postpartum hemorrhage and infant  
5 morbidity and mortality. With this evidence, traditional and religious leaders, long recognized as  
6 key partners to ending the harmful practice of child marriage in Africa,<sup>32</sup> can be appropriately  
7 mobilized and their support enlisted towards delaying girls marriage till full maturity. Moreover, the  
8 findings could provide factual tools for policy makers, responsible for health planning and funding,  
9 to improve maternal and child health indices in Maiduguri. There is evidence that reducing  
10 adolescent births among young girls, as well as ensuring that pregnant adolescents have access to  
11 quality maternal health services are effective strategies for addressing the problem of neonatal  
12 mortality and negative health outcomes among both adolescent mothers and their infants in the  
13 developing countries.<sup>17</sup> Until now, only one study has provided empirical data on the impact of  
14 early marriage practices in northeastern Nigeria.<sup>21</sup> Therefore, scarce evidence-based information  
15 such as in the present study is relevant for policy makers to enhance effective and targeted  
16 interventions to improve maternal and child health in a most economically disadvantaged and  
17 medically underserved region of Nigeria.

18  
19  
20  
21  
22  
23  
24  
25  
26  
27  
28  
29 Our study has some important limitations that should be considered when interpreting the  
30 findings. First, the study adopted a cross-sectional design, in which causality between motherhood  
31 in adolescence and maternal and child health indices cannot be inferred. Second, the questionnaire  
32 utilized for the study did not explore important pregnancy related complications like heavy bleeding  
33 and anaemia, and its construct validity and reliability are unknown. However, the items in the  
34 questionnaire are the similar to those used in previous studies.<sup>21,26,27</sup> Third, the maternal and child  
35 health consequences explored in the present study is presented in child mortality and morbidity  
36 counts and prevalence only. The cost of care and burden of diseases due to early motherhood have  
37 not been analysed in pecuniary terms, neither has this cost been compared with cost of care for adult  
38 mothers. Fourth, the study involved a convenience sample of urban living mothers in a metropolitan  
39 city. Thus, the findings may not generalize to other samples with different demographics in the  
40 Nigerian society. Also, the small sample size and the inherent selection bias in the sampling strategy  
41 constitute some limitations to the present study regarding its generalizability to the entire Maiduguri  
42 population. However, the findings of this preliminary study suggest that motherhood in adolescence  
43 is a potential risk factor to some adverse maternal and child health indices. In order to better  
44 estimate the impact of early marriage and motherhood on maternal and child morbidity for Nigeria  
45  
46  
47  
48  
49  
50  
51  
52  
53  
54  
55  
56  
57  
58  
59  
60

1  
2  
3 or identify any pattern to the disease burden, there is the need for an expanded survey at a regional  
4 or national scale to include the rural population in Nigeria.  
5  
6  
7

## 8 **Conclusion**

9  
10 Adolescent motherhood was associated with negative maternal and child health indices  
11 among urban dwelling mothers in Maiduguri city. The findings suggest the need for community  
12 health promotion and public health interventions to improve maternal and child health among early  
13 married mothers in Maiduguri, Nigeria. Data from the study can be used to inform effective  
14 community and primary health care practice and public health campaign to improve maternal and  
15 child health indices in Maiduguri, Nigeria. However, for effective population wide public health  
16 actions to improve maternal and child health in Nigeria, future studies are needed to confirm this  
17 evidence at the regional or national level including the rural population in Nigeria.  
18  
19  
20  
21  
22  
23  
24  
25

26 **Contributors:** ALO, SUA, FS, AAU, AMJ and AYO were involved in the design of the study.  
27 SUA, FS, AMJ and AYO led the data collection. SUA, FS and AYO led data cleaning and data  
28 analysis. ALO contributed to data analysis and interpretation of results. ALO and AYO wrote the  
29 manuscript. SUA and AAU revised the drafted manuscript. ALO drafted the revisions. All authors  
30 gave approval of the final manuscript.  
31  
32  
33  
34  
35

36 **Funding:** None.  
37  
38  
39

40 **Competing interests:** None declared.  
41  
42  
43

44 **Patient consent:** Participants consent obtained.  
45  
46

47 **Ethics approval:** This study was reviewed and approved by the ethical committee of the University  
48 oh Maiduguri Teaching Hospital, Maiduguri, Nigeria  
49  
50  
51

52 **Data sharing statement:** No additional data are available.  
53  
54  
55  
56  
57  
58  
59  
60

## REFERENCES

1. World Health Organization [Internet]. Adolescent pregnancy: WHO factsheet 2018. <http://www.who.int/en/news-room/fact-sheets/detail/adolescent-pregnancy> (accessed Nov 04, 2018).
2. United Nations Children's Fund. *Early Marriage: A Harmful Traditional Practice*. A Statistical Exploration. New York: UNICEF, 2005. [https://www.unicef.org/publications/index\\_26024.html](https://www.unicef.org/publications/index_26024.html) (accessed 12 March 2018).
3. Parsons J, Edmeades J, Kes A, Petroni S, Sexton M, Wodon Q. Economic impacts of child marriage: A review of the literature. *The Review of Faith & International Affairs* 2015;13(3):12-22, DOI: 10.1080/15570274.2015.1075757
4. United Nations Population Fund-United Nations Children's Fund. *Global programme to accelerate action to end child marriage. Progress report 2016*. UNFPA-UNICEF, 2017. <https://www.unicef.org/protection/files/ChildMarriage-Global-DonorReport-v7.pdf> (accessed 12 March 2018).
5. United Nations Children's Fund, *Accelerating Efforts to Eliminate Child Marriage in Africa*. New York: UNICEF, 2017 [https://www.unicef.org/protection/files/Child\\_Marriage\\_Brochure\\_2017.pdf](https://www.unicef.org/protection/files/Child_Marriage_Brochure_2017.pdf) (accessed 12 March 2018).
6. United Nations Children's Fund. *Ending Child Marriage: Progress and prospects*. New York: UNICEF, 2014. <https://data.unicef.org/resources/ending-child-marriage-progress-and-prospects/> (accessed 12 March 2018)
7. Nour NM. Health consequences of child marriage in Africa. *Emerg Infect Dis* 2006;12(11):1644-9.
8. World Health Organization. *Obstetric Fistula. Guiding principles for clinical management and programed development*. Geneva: World Health Press, 2006: [http://www.who.int/reproductivehealth/publications/maternal\\_perinatal\\_health/9241593679/en/](http://www.who.int/reproductivehealth/publications/maternal_perinatal_health/9241593679/en/) (accessed 12 March 2018).
9. Nour NM. Child marriage: A Silent and human rights issue. *Rev Obstet Gynecol* 2009; 2(1): 51-56.

10. World Health Organization. *Meeting to develop a global consensus on preconception care to reduce maternal and childhood mortality and morbidity*. Geneva: WHO, 2013.
11. Say L, Raine R. A systematic review of inequalities in the use of maternal health care in developing countries: examining the scale of the problem and the importance of context. *Bull World Health Organ* 2007;85(10):812–9.
12. Langlois EV, Miskurka M, Zunzunegui MV, Ghaffar A, Ziegler D, Karp I. Inequities in postnatal care in low- and middle-income countries: a systematic review and meta-analysis. *Bull World Health Organ* 2015;93:259-70
13. Chen X-K, Wen SW, Fleming N, Demissie K, Rhoads GG, Walker M. Teenage pregnancy and adverse birth outcomes: a large population based retrospective cohort study. *Int J Epidemiol*. 2007; 36(2):368 - 73. <https://doi.org/10.1093/ije/dyl284> PMID: 17213208
14. de Vienne CM, Creveuil C, Dreyfus M. Does young maternal age increase the risk of adverse obstetric, fetal and neonatal outcomes: a cohort study. *Eur J Obstet Gynecol Reprod Biol* 2009;147:151–6.
15. Chen CW, Tsai CY, Sung FC, et al. Adverse birth outcomes among pregnancies of teen mothers: age-specific analysis of national data in Taiwan. *Child Care Health Dev* 2010;36:232–40.
16. Marvin-Dowle K, Kilner K, Burley VJ, et al. Impact of adolescent age on maternal and neonatal outcomes in the Born in Bradford cohort. *BMJ Open* 2018;8:e016258. doi:10.1136/bmjopen-2017-016258
17. Neal S, Channon AA, Chintsanya J. The impact of young maternal age at birth on neonatal mortality: Evidence from 45 low and middle income countries. *PLoS ONE* 2018;13(5): e0195731. <https://doi.org/10.1371/journal.pone.0195731>
18. Ganchimeg T, Ota E, Morisaki N, Laopaiboon M, Lumbiganon P, Zhang J, et al. Pregnancy and childbirth outcomes among adolescent mothers: a World Health Organization multicountry study. *Brit J Obstet Gynaecol*. 2014; 121(s1):40 - 8.
19. Walker JA, Mukisa S, Hashim Y, Ismail H. *Mapping Early Marriage in West Africa: A Scan of Trends, Interventions, What Works, Best Practices, and the Way Forward*. Ford Foundation, 2013.
20. Alkema L, Chou D, Hogan D, et al. Global, regional, and national levels and trends in maternal mortality between 1990 and 2015, with scenario-based projections to 2030: A



- 1  
2  
3 systematic analysis by the UN Maternal Mortality Estimation Inter-Agency Group. *Lancet*  
4 2016;387(10017):462–74.  
5  
6  
7 21. Adedokun O, Adeyemi O, Dauda C. Child marriage and maternal health risks among young  
8 mothers in Gombi, Adamawa State, Nigeria: Implications for mortality, entitlements and  
9 freedoms. *Afri Health Sci* 2016;16(4): 986-99.  
10  
11 22. Federal Ministry of Health. *National Health Policy 2016: Promoting the Health of*  
12 *Nigerians to Accelerate Socioeconomic Development*. FMOH, September 2016  
13  
14 23. Population City. Maiduguri population, 2018. <http://population.city/nigeria/maiduguri/>  
15 (accessed 03 March 2018)  
16  
17 24. Cohen JA: *Statistical Power Analysis for the Behavioural Sciences*. 2nd edition. Hillsdale,  
18 NJ: Lawrence Erlbaum Associates; 1988.  
19  
20 25. National Population Commission (NPC) [Nigeria] and ICF International 2014 Nigeria  
21 Demographic and Health Survey 2013. Abuja, Nigeria and Rockville, MD, NPC and ICF  
22 International.  
23  
24 26. Melo EC, Ribeiro AB, de Oliveira RR, Zurita RC, Mathias TA. Analysis of maternal and  
25 child health indicators in an area at Parana State, Brazil. *Nurs Res Pract* 2013:495178. doi:  
26 10.1155/2013/495178.  
27  
28 27. Raj A, Saggurti N, Winter M, et al. The effect of maternal child marriage on morbidity and  
29 mortality of children under 5 in India: Cross sectional study of a nationally representative  
30 sample. *BMJ* 2010;340:b4258. doi:10.1136/bmj.b4258  
31  
32 28. World Health Organization. *Obesity: Prevention and managing the global epidemic*. Report  
33 of a WHO consultation on obesity. Geneva, Switzerland: World Health Organization; 1988.  
34  
35 29. Pathfinder International Ethiopia. *Report on causes and consequences of early marriage in*  
36 *Amhara region*. Addis Ababa: Pathfinder International, 2006.  
37  
38 [http://www.pathfinder.org/publications/causes-and-consequences-of-early-marriage-in-the-](http://www.pathfinder.org/publications/causes-and-consequences-of-early-marriage-in-the-amhara-region-of-ethiopia/)  
39 [amhara-region-of-ethiopia/](http://www.pathfinder.org/publications/causes-and-consequences-of-early-marriage-in-the-amhara-region-of-ethiopia/) (accessed 29 March 2018).  
40  
41 30. International Women's Health Program. *Early Marriage*. The Society of Obstetricians and  
42 Gynaecologists of Canada. Web. 30 Apr. 2010. [http://iwhp.sogc.org/index.php?page=early-](http://iwhp.sogc.org/index.php?page=early-marriage)  
43 [marriage](http://iwhp.sogc.org/index.php?page=early-marriage) (accessed 01 April 2018)  
44  
45 31. Adamu AN, Tunau KA, Hassan M, Ekele BA. The perception of patients' relations on the  
46 cause of eclampsia. *Gynecol Obstet (Sunnyvale)* 4: 205. doi:10.4172/2161-0932.1000205  
47  
48  
49  
50  
51  
52  
53  
54  
55  
56  
57  
58  
59  
60



1  
2  
3 32. African Union. *Campaign to end child marriage in Africa. The Effects of Traditional and*  
4 *Religious Practices of Child Marriage on Africa's Socio-Economic Development. A Review*  
5 *of Research, Reports and Toolkits from Africa, 2015.*  
6  
7

8 [https://au.int/sites/default/files/documents/31018-doc-5465\\_ccmc\\_africa\\_report.pdf](https://au.int/sites/default/files/documents/31018-doc-5465_ccmc_africa_report.pdf)

9  
10 (accessed 01 April 2018)  
11  
12  
13  
14  
15  
16  
17  
18  
19  
20  
21  
22  
23  
24  
25  
26  
27  
28  
29  
30  
31  
32  
33  
34  
35  
36  
37  
38  
39  
40  
41  
42  
43  
44  
45  
46  
47  
48  
49  
50  
51  
52  
53  
54  
55  
56  
57  
58  
59  
60

For peer review only

## QUESTIONNAIRE ASSESSING MATERNAL AND CHILD HEALTH INDICES

### Socio-demographic Form

1. Age.....years
2. Age at the time of marriage.....years
3. Height.....meters
4. Weight.....kg
5. Child Age.....years
6. Child Sex
  - Male.....1
  - Female.....2
7. Highest level of formal Education
  - NIL.....1
  - Primary.....2
  - Secondary.....3
  - Tertiary.....4
8. Occupation
  - Farming .....1
  - Trading.....2
  - Civil Servant.....3
  - House wife.....4
9. Religious affiliation
  - Muslim.....1
  - Christian .....2
10. Number of children ever born
  - One.....1
  - Two.....2
  - Three.....3
  - Four and above.....4
11. Marital status
  - Married.....1
  - Not married.....2
  - Divorced.....3
  - Widowed.....4
12. Duration of marriage (years)
  - Less Than 5.....1
  - 5 to 9.....2

### Household Items

13. Main source of drinking water?
  - Piped water/bore hole into dwelling.....1
  - Public tap/bore hole.....2
  - Open well into dwelling.....3
  - Surface Water.....4
  - Others .....5
14. Type of Toilet Facilities in your House hold?
  - Flush toilet.....1
  - Pit toilet/latrine.....2

|    |                                                      |                   |
|----|------------------------------------------------------|-------------------|
| 1  |                                                      |                   |
| 2  |                                                      |                   |
| 3  |                                                      | No Facility.....3 |
| 4  | 15. What does your household mainly use for cooking? |                   |
| 5  |                                                      | Gas.....1         |
| 6  |                                                      | Kerosene.....2    |
| 7  |                                                      | Charcoal.....3    |
| 8  |                                                      | Fire wood.....4   |
| 9  |                                                      |                   |
| 10 | 16. Do you have a car or bus in your household?      |                   |
| 11 |                                                      | Yes.....1         |
| 12 |                                                      | No.....2          |
| 13 |                                                      |                   |
| 14 |                                                      |                   |

## Questions on Maternal and Child Health Indices

### Section A: Maternal issues

|    |                                                         |                     |
|----|---------------------------------------------------------|---------------------|
| 17 | 1. The decision to marry taken by?                      |                     |
| 18 |                                                         | Both partners.....1 |
| 19 |                                                         | Parents.....2       |
| 20 |                                                         | Others.....3        |
| 21 |                                                         |                     |
| 22 | 2. Ever experience Domestic violence?                   |                     |
| 23 |                                                         | Yes.....1           |
| 24 |                                                         | No.....2            |
| 25 | 3. Ever had discussion on family planning with spouse?  |                     |
| 26 |                                                         | Yes.....1           |
| 27 |                                                         | No.....2            |
| 28 |                                                         |                     |
| 29 | 4. Ever experienced pregnancy related complications?    |                     |
| 30 |                                                         | Yes.....1           |
| 31 |                                                         | No.....2            |
| 32 | 5. Ever experienced postpartum hemorrhage?              |                     |
| 33 |                                                         | Yes.....1           |
| 34 |                                                         | No.....2            |
| 35 |                                                         |                     |
| 36 | 6. Ever had Eclampsia?                                  |                     |
| 37 |                                                         | Yes.....1           |
| 38 |                                                         | No.....2            |
| 39 | 7. Ever experienced Obstructed and/or prolonged Labor?  |                     |
| 40 |                                                         | Yes.....1           |
| 41 |                                                         | No.....2            |
| 42 |                                                         |                     |
| 43 | 8. Ever had prolonged sickness after child birth?       |                     |
| 44 |                                                         | Yes.....1           |
| 45 |                                                         | No.....2            |
| 46 | 9. Ever Experienced Fistula?                            |                     |
| 47 |                                                         | Yes.....1           |
| 48 |                                                         | No.....2            |
| 49 |                                                         |                     |
| 50 | 10. Ever had sexually transmitted infections (STI)?     |                     |
| 51 |                                                         | Yes.....1           |
| 52 |                                                         | No.....2            |
| 53 |                                                         |                     |
| 54 | 11. Type of Health personnel for delivery of last child |                     |
| 55 |                                                         | Doctor.....1        |
| 56 |                                                         |                     |
| 57 |                                                         |                     |
| 58 |                                                         |                     |
| 59 |                                                         |                     |
| 60 |                                                         |                     |

|    |                                                     |                                 |
|----|-----------------------------------------------------|---------------------------------|
| 1  |                                                     |                                 |
| 2  |                                                     |                                 |
| 3  |                                                     | Nurse.....2                     |
| 4  |                                                     | Midwife.....3                   |
| 5  |                                                     | Traditional birth attendant...4 |
| 6  |                                                     |                                 |
| 7  | 12. Do you attend ante natal care during pregnancy? |                                 |
| 8  |                                                     | Yes.....1                       |
| 9  |                                                     | No.....2                        |
| 10 | 13. Ever had history of miscarriage?                |                                 |
| 11 |                                                     | Yes.....1                       |
| 12 |                                                     | No.....2                        |
| 13 |                                                     |                                 |

### Section B: Child items

|    |                                                                         |           |
|----|-------------------------------------------------------------------------|-----------|
| 14 |                                                                         |           |
| 15 |                                                                         |           |
| 16 | 14. Child weight at birth.....kg                                        |           |
| 17 | 15. Does your child weight at birth low?                                |           |
| 18 |                                                                         | Yes.....1 |
| 19 |                                                                         | No.....2  |
| 20 | 16. Does the child suffer any infectious illness two weeks after birth? |           |
| 21 |                                                                         | Yes.....1 |
| 22 |                                                                         | No.....2  |
| 23 |                                                                         |           |
| 24 | If yes please specify.....                                              |           |
| 25 | 17. Any child lost in the last five years?                              |           |
| 26 |                                                                         | Yes.....1 |
| 27 |                                                                         | No.....2  |
| 28 | 18. Ever had stillbirth?                                                |           |
| 29 |                                                                         | Yes.....1 |
| 30 |                                                                         | No.....2  |
| 31 |                                                                         |           |
| 32 |                                                                         |           |
| 33 |                                                                         |           |
| 34 |                                                                         |           |
| 35 |                                                                         |           |
| 36 |                                                                         |           |
| 37 |                                                                         |           |
| 38 |                                                                         |           |
| 39 |                                                                         |           |
| 40 |                                                                         |           |
| 41 |                                                                         |           |
| 42 |                                                                         |           |
| 43 |                                                                         |           |
| 44 |                                                                         |           |
| 45 |                                                                         |           |
| 46 |                                                                         |           |
| 47 |                                                                         |           |
| 48 |                                                                         |           |
| 49 |                                                                         |           |
| 50 |                                                                         |           |
| 51 |                                                                         |           |
| 52 |                                                                         |           |
| 53 |                                                                         |           |
| 54 |                                                                         |           |
| 55 |                                                                         |           |
| 56 |                                                                         |           |
| 57 |                                                                         |           |
| 58 |                                                                         |           |
| 59 |                                                                         |           |
| 60 |                                                                         |           |

1  
2  
3  
4  
5  
6  
7  
8  
9  
10  
11  
12  
13  
14  
15  
16  
17  
18  
19  
20  
21  
22  
23  
24  
25  
26  
27  
28  
29  
30  
31  
32  
33  
34  
35  
36  
37  
38  
39  
40  
41  
42  
43  
44  
45  
46  
47  
48  
49  
50  
51  
52  
53  
54  
55  
56  
57  
58  
59  
60STROBE Statement—Checklist of items that should be included in reports of *cross-sectional studies*

|                              | Item No | Recommendation                                                                                                                                                                                                                                                                                                                                                                                |
|------------------------------|---------|-----------------------------------------------------------------------------------------------------------------------------------------------------------------------------------------------------------------------------------------------------------------------------------------------------------------------------------------------------------------------------------------------|
| <b>Title and abstract</b>    | 1       | (a) Indicate the study's design with a commonly used term in the title or the abstract [pg1]<br>(b) Provide in the abstract an informative and balanced summary of what was done and what was found [pg2]                                                                                                                                                                                     |
| <b>Introduction</b>          |         |                                                                                                                                                                                                                                                                                                                                                                                               |
| Background/rationale         | 2       | Explain the scientific background and rationale for the investigation being reported [pg4-5]                                                                                                                                                                                                                                                                                                  |
| Objectives                   | 3       | State specific objectives, including any prespecified hypotheses [pg5]                                                                                                                                                                                                                                                                                                                        |
| <b>Methods</b>               |         |                                                                                                                                                                                                                                                                                                                                                                                               |
| Study design                 | 4       | Present key elements of study design early in the paper [pg6]                                                                                                                                                                                                                                                                                                                                 |
| Setting                      | 5       | Describe the setting, locations, and relevant dates, including periods of recruitment, exposure, follow-up, and data collection [pg6-7]                                                                                                                                                                                                                                                       |
| Participants                 | 6       | (a) Give the eligibility criteria, and the sources and methods of selection of participants [pg6]                                                                                                                                                                                                                                                                                             |
| Variables                    | 7       | Clearly define all outcomes, exposures, predictors, potential confounders, and effect modifiers. Give diagnostic criteria, if applicable [pg7]                                                                                                                                                                                                                                                |
| Data sources/<br>measurement | 8*      | For each variable of interest, give sources of data and details of methods of assessment (measurement). Describe comparability of assessment methods if there is more than one group [pg7]                                                                                                                                                                                                    |
| Bias                         | 9       | Describe any efforts to address potential sources of bias                                                                                                                                                                                                                                                                                                                                     |
| Study size                   | 10      | Explain how the study size was arrived at [pg6]                                                                                                                                                                                                                                                                                                                                               |
| Quantitative variables       | 11      | Explain how quantitative variables were handled in the analyses. If applicable, describe which groupings were chosen and why                                                                                                                                                                                                                                                                  |
| Statistical methods          | 12      | (a) Describe all statistical methods, including those used to control for confounding [pg8]<br>(b) Describe any methods used to examine subgroups and interactions<br>(c) Explain how missing data were addressed<br>(d) If applicable, describe analytical methods taking account of sampling strategy<br>(e) Describe any sensitivity analyses                                              |
| <b>Results</b>               |         |                                                                                                                                                                                                                                                                                                                                                                                               |
| Participants                 | 13*     | (a) Report numbers of individuals at each stage of study—eg numbers potentially eligible, examined for eligibility, confirmed eligible, included in the study, completing follow-up, and analysed<br>(b) Give reasons for non-participation at each stage<br>(c) Consider use of a flow diagram                                                                                               |
| Descriptive data             | 14*     | (a) Give characteristics of study participants (eg demographic, clinical, social) and information on exposures and potential confounders [pg8]<br>(b) Indicate number of participants with missing data for each variable of interest                                                                                                                                                         |
| Outcome data                 | 15*     | Report numbers of outcome events or summary measures [pg10-11]                                                                                                                                                                                                                                                                                                                                |
| Main results                 | 16      | (a) Give unadjusted estimates and, if applicable, confounder-adjusted estimates and their precision (eg, 95% confidence interval). Make clear which confounders were adjusted for and why they were included [pg12]<br>(b) Report category boundaries when continuous variables were categorized<br>(c) If relevant, consider translating estimates of relative risk into absolute risk for a |

|                          |    |                                                                                                                                                                                      |
|--------------------------|----|--------------------------------------------------------------------------------------------------------------------------------------------------------------------------------------|
|                          |    | meaningful time period                                                                                                                                                               |
| Other analyses           | 17 | Report other analyses done—eg analyses of subgroups and interactions, and sensitivity analyses                                                                                       |
| <b>Discussion</b>        |    |                                                                                                                                                                                      |
| Key results              | 18 | Summarise key results with reference to study objectives [pg14]                                                                                                                      |
| Limitations              | 19 | Discuss limitations of the study, taking into account sources of potential bias or imprecision. Discuss both direction and magnitude of any potential bias [pg16]                    |
| Interpretation           | 20 | Give a cautious overall interpretation of results considering objectives, limitations, multiplicity of analyses, results from similar studies, and other relevant evidence [pg14-16] |
| Generalisability         | 21 | Discuss the generalisability (external validity) of the study results [pg16]                                                                                                         |
| <b>Other information</b> |    |                                                                                                                                                                                      |
| Funding                  | 22 | Give the source of funding and the role of the funders for the present study and, if applicable, for the original study on which the present article is based [pg17]                 |

\*Give information separately for exposed and unexposed groups.

**Note:** An Explanation and Elaboration article discusses each checklist item and gives methodological background and published examples of transparent reporting. The STROBE checklist is best used in conjunction with this article (freely available on the Web sites of PLoS Medicine at <http://www.plosmedicine.org/>, Annals of Internal Medicine at <http://www.annals.org/>, and Epidemiology at <http://www.epidem.com/>). Information on the STROBE Initiative is available at [www.strobe-statement.org](http://www.strobe-statement.org).

# BMJ Open

## Association between adolescent motherhood and maternal and child health indices in Maiduguri, Nigeria: A community-based cross-sectional study

|                                 |                                                                                                                                                                                                                                                                                                                                                                                                                                                                                                        |
|---------------------------------|--------------------------------------------------------------------------------------------------------------------------------------------------------------------------------------------------------------------------------------------------------------------------------------------------------------------------------------------------------------------------------------------------------------------------------------------------------------------------------------------------------|
| Journal:                        | <i>BMJ Open</i>                                                                                                                                                                                                                                                                                                                                                                                                                                                                                        |
| Manuscript ID                   | bmjopen-2018-024017.R2                                                                                                                                                                                                                                                                                                                                                                                                                                                                                 |
| Article Type:                   | Research                                                                                                                                                                                                                                                                                                                                                                                                                                                                                               |
| Date Submitted by the Author:   | 26-Dec-2018                                                                                                                                                                                                                                                                                                                                                                                                                                                                                            |
| Complete List of Authors:       | Oyeyemi, Adewale; University of Maiduguri Medical College, Physiotherapy<br>Aliyu, Salamatu; University of Maiduguri Medical College, Physiotherapy<br>Sa'ad, Fatima; Neuropsychiatric Hospital Maiduguri, Physiotherapy<br>Rufa'i, Adamu; University of Maiduguri, Physiotherapy; Universiti Sains Malaysia, School of Health Sciences<br>Jajere, AbdulRahman; University of Maiduguri Teaching Hospital, Physiotherapy<br>Oyeyemi, Adetoyeje; University of Maiduguri Medical College, Physiotherapy |
| <b>Primary Subject Heading</b>: | Public health                                                                                                                                                                                                                                                                                                                                                                                                                                                                                          |
| Secondary Subject Heading:      | Paediatrics, Obstetrics and gynaecology, Public health                                                                                                                                                                                                                                                                                                                                                                                                                                                 |
| Keywords:                       | OBSTETRICS, Public health < INFECTIOUS DISEASES, Community gynaecology < GYNAECOLOGY, PRIMARY CARE                                                                                                                                                                                                                                                                                                                                                                                                     |
|                                 |                                                                                                                                                                                                                                                                                                                                                                                                                                                                                                        |

SCHOLARONE™  
Manuscripts

1  
2  
3 **Association between adolescent motherhood and maternal and child health indices in**  
4 **Maiduguri, Nigeria: A community-based cross-sectional study**  
5

6  
7 Adewale L Oyeyemi,<sup>1</sup> Salamatu U Aliyu,<sup>1</sup> Fatima Sa'ad,<sup>2</sup> Adamu A Rufai,<sup>1</sup>  
8 Abdulrahman M Jajere,<sup>3</sup> Adetoyeje Y Oyeyemi<sup>1,3\*</sup>  
9

10  
11  
12 <sup>1</sup>Department of Medical Rehabilitation (Physiotherapy), University of Maiduguri, Maiduguri,  
13 Borno State, Nigeria.  
14

15  
16 <sup>2</sup>Department of Physiotherapy, Neuropsychiatric Hospital, Maiduguri, Borno State, Nigeria.  
17

18  
19 <sup>3</sup>Department of Physiotherapy, University of Maiduguri Teaching Hospital, Maiduguri, Borno  
20 State, Nigeria.  
21

22  
23  
24  
25  
26  
27  
28 -----  
29  
30  
31 **Corresponding Author**

32 Dr. Adetoyeje Y. Oyeyemi, Department of Medical Rehabilitation (Physiotherapy), University of  
33 Maiduguri, Maiduguri, Borno State, Nigeria; E-mail: adeoyeyemi@aol.com  
34  
35  
36  
37  
38  
39  
40  
41  
42  
43  
44  
45  
46  
47  
48  
49  
50  
51  
52  
53  
54  
55  
56  
57  
58  
59  
60



## ABSTRACT

**Introduction:** Adolescent motherhood (child bearing below 18 years of age) is a major global health and social problem. Understanding the impact of early motherhood on maternal and child health indices is important to community and population health promotion in developing countries. This study examined the association between adolescent motherhood and maternal and child health indices in Maiduguri, Nigeria.

**Methods:** A cross-sectional design method was used to recruit 220 mothers (age= 14 – 25 years) from four communities in the city of Maiduguri, Northeastern Nigeria. Participants were surveyed using a self-developed interviewer administered questionnaire that assesses maternal and child health indices and sociodemographic characteristics. Logistic regression analysis was used to compute adjusted odd ratios (OR) and 95% confidence interval (95%CI) of the associations between motherhood in adolescence (mothers below 18 years old) and maternal and child health indices.

**Results:** Adolescent mothers were more likely to experience fistula (OR=5.01, 95%CI=3.01-14.27), to have postpartum hemorrhage (OR=6.83, 95%CI=2.93-15.92), to have sexually transmitted infections (OR=6.29, 95%CI=2.26-17.51) and to lose a child within 5 years of birth (OR=3.52, 95%CI=1.07-11.60), compared to adult mothers. Children born to adolescent mothers were less likely to have normal weight at birth (OR=0.34, CI=0.15-0.73) than those born to adult mothers.

**Conclusion:** Adolescent motherhood was associated with negative maternal and child health indices. The findings can be used by public health professionals including physiotherapists in this role to inform effective primary health care practice and community health advocacy to improve maternal and child health indices among adolescent mothers in Maiduguri. Future studies are needed to confirm the evidence at the regional or national level including the rural population in Nigeria.

**Keywords:** Adolescent pregnancy, early marriage, teenage mothers, maternal health, adverse child health outcomes

### Strengths and limitations of this study

- This is one of the few community-based studies to assess the impact of early marriage and adolescent motherhood on maternal and child health indices in Nigeria
- The study utilized equal sample of adolescent and non-adolescent mothers to make the result more robust
- Evidence from the data can be used to inform effective primary health care practice and public health advocacy to improve maternal and child health indices among adolescent mothers in the medically underserved and economically disadvantaged Northeast region of Nigeria
- The study involved a convenience sample of urban community dwelling mothers, so findings may not generalize to other samples with different characteristics in Nigeria
- Causality between adolescent motherhood and maternal and child health indices cannot be inferred due to the cross-sectional design nature of the study

## INTRODUCTION

Adolescent motherhood is an important social and public health problem.<sup>1</sup> It is a common consequence of early marriage, that has been defined as a formal marriage or informal union entered into by an individual before reaching the age of 18 years.<sup>2,3</sup> Worldwide, approximately 750 million girls and women were married before the age of 18.<sup>4</sup> In the developing countries, about 16 million adolescent mothers aged 15 to 19 years and 2.5 million girls under 16 years give birth each year.<sup>1</sup> Across Africa, 125 million girls and women alive today were married, with attendant pregnancies, before their 18th birthday.<sup>5</sup> This practice is most common in West and Central Africa where more than 4 in 10 girls were married before age 18, and about 1 in 7 were married or in union before age 15.<sup>4</sup> Underage-brides are often likely to be forced into sexual activities and commence child bearing early and are therefore at higher risks of death from complications of pregnancy and child birth.<sup>1,2,6</sup> They are also at risk for developing health complications arising from early pregnancy that includes heavy bleeding, sexually transmitted infections, eclampsia, obstructed labour and obstetric fistula, all due to physical and sexual immaturity.<sup>6,7,8</sup> Moreover, due to adolescents' physiological and social immaturity and their lack of adequate prenatal care, health risks associated with pregnancies and childbearing are more pronounced among them than among older women.<sup>1,9</sup>

High death rates among adolescent mothers are usually due to eclampsia, postpartum hemorrhage, sepsis, HIV infection, malaria, and obstructed labour.<sup>9</sup> In developing countries, these problems may occur as a result of lack of preconception care that include education, health promotion, screening and other interventions among women of reproductive age.<sup>10</sup> Another factor is lack of access to postnatal care which include intervention to facilitate speedy recovery after birth, and to address concerns about newborn care, nutrition, breastfeeding, and family planning.<sup>11,12</sup> In most African countries, many of the problems associated with childbearing are also partly attributed to lack of timely and appropriate health care attention during pregnancy.<sup>7</sup> Adolescent mothers are more susceptible to anaemia than adults and this greatly increases the risk and complications linked to pregnancy,<sup>7</sup> especially with the added pressure to prove their fertility in the first year of marriage as is the cultural practice in many developing countries.<sup>3,6,9</sup>

1  
2  
3 Child bearing during adolescence is not only a risk factor for adverse maternal health  
4 outcomes, but also has negative impacts on child health indices and the future well-being of the  
5 infants.<sup>1</sup> Previous studies have documented associations between adolescent births and increased  
6 incidence of negative perinatal and child health outcomes, such as preterm delivery, low birth  
7 weight and perinatal death.<sup>13-16</sup> Recent evidence from a study involving 45 low-and middle-  
8 income countries found the risk of neonatal mortality in all regions, including Africa, to be  
9 markedly greater for infants with adolescent mothers and suggested reducing adolescent births as an  
10 important strategy for addressing the problem of neonatal mortality in the developing countries.<sup>17</sup>  
11 In addition, a large multi-country study that included data from African countries reported higher  
12 risks of low birthweight, preterm delivery and severe neonatal conditions, and an increased risk of  
13 intra-hospital early neonatal mortality among infants born to adolescent mothers compared with  
14 adult mothers.<sup>18</sup>

15  
16  
17  
18  
19  
20  
21  
22  
23  
24 In Nigeria, adolescent motherhood is believed to be rampant because an estimated 28.7% of  
25 girls (absolute number=2,470,183) were married before the age of 18 years as of 2010.<sup>19</sup> This  
26 prevalence is expected to double by 2050 and Nigeria is expected to have the largest absolute  
27 number of child bride in the coming decades.<sup>5</sup> Although, Nigeria contributes to 1 in 5 and 1 in 4 of  
28 the global and regional maternal deaths,<sup>20</sup> respectively, yet there is paucity of evidence on the  
29 impact of adolescent motherhood on maternal and child health indices in Nigeria. Therefore, to  
30 enhance effective maternal and child health interventions in the vulnerable population subgroups, it  
31 is important to understand the impact of child marriage on maternal and child health in Nigeria. A  
32 recent study in North east Nigeria reported high maternal morbidity through various pregnancy  
33 complications among residents of Gombi, a town in Adamawa State.<sup>21</sup> However, until now, there is  
34 no report on the impact of adolescent motherhood on maternal and child health indices in  
35 Maiduguri, Borno State of Nigeria.

36  
37  
38  
39  
40  
41  
42  
43  
44  
45 Maiduguri city is the origin of a religious uprising which started in 2009 and became  
46 escalated to an armed insurgency in the northeastern Nigeria which continues until 2016 when the  
47 insurgency activities within the city became degraded. This city however houses Internally  
48 Displaced Persons including adolescent mothers, in several camps up till now. The present study  
49 aimed to examine the associations between motherhood in adolescence (mothers below 18 years  
50 old) and maternal and child health indices in Maiduguri, Nigeria. This is a preliminary attempt to  
51 provide insights into the impact of early marriage on population health in the most economically  
52  
53  
54  
55  
56  
57  
58  
59  
60

1  
2  
3 disadvantaged and medically underserved region of Nigeria. In the present study, the terms  
4 adolescent mothers, teenage brides and minor mothers are used interchangeably to describe  
5 adolescent girls who were married before the age of 18 years.  
6  
7

## 8 9 **METHODS**

### 10 11 **Setting, design and participants**

12  
13  
14 The study was conducted in Maiduguri which is the capital city of Borno State and the  
15 commercial center of the north eastern geopolitical zone of Nigeria. This zone comprising of six  
16 states including Yobe, Adamawa, Taraba, Bauchi, Gombe and the Borno States, is considered to be  
17 economically disadvantaged with least manpower resources and is also the most medically  
18 underserved zone in Nigeria.<sup>22</sup> The city of Maiduguri has an estimated population of 1.2 million  
19 people.<sup>23</sup>  
20  
21  
22  
23  
24

25  
26 The study adopted a cross-sectional survey design to recruit 247 young mothers from their  
27 various households at *Gwange*, *Bulunkutu*, *Lamisula* and *Kofa biyu* communities (wards) in  
28 Maiduguri city. The age range (12 – 25 years) of the young mothers was based on definitions from  
29 previous studies on the same topic.<sup>18,21</sup> Sample size was calculated with the Cohen's formula:  $n = \frac{2}{d^2} (Z_1 + Z_2)^2$ . Using a modest effect size statistic [ $d = 0.40$ ],<sup>24</sup> we determined that 192 participants  
30 (96 each per group for adolescent and adult mothers) were needed to detect a moderate to large  
31 effect size with more than 80% power at 95% confidence interval. A three-stage approach was used  
32 to determine household and participants selection into the study. In stage one, four wards  
33 (communities) were randomly selected (ballot method) from the available 15 communities in  
34 Maiduguri.<sup>25</sup> In the second stage, for convenient purpose, three streets each were randomly selected  
35 (ballot method) in each of the four communities. In stage three, houses and participants were  
36 selected using convenient sampling technique. From each of the selected houses, all mothers that  
37 met the inclusion criteria and were willing to participate were recruited into the study.  
38  
39  
40  
41  
42  
43  
44  
45  
46  
47  
48

49 The eligibility criteria for the study were (1) being a mother between the ages of 12 and 25  
50 years, (2) having at least one child, (3) living within the identified community in the last 12 months,  
51 and (4) willing to be interviewed for a survey in English or Hausa language. Mothers that got  
52 married at the age of 26 years and above, those that were experiencing their first pregnancy and yet  
53 to deliver a baby and mothers that married for more than 10 years were excluded from the study.  
54  
55  
56  
57  
58  
59  
60

1  
2  
3 Based on the preference of each participant, the survey interview was conducted by one of the  
4 researchers (FS) using either the English or Hausa language. The researcher who administered the  
5 survey was a native speaker of Hausa and also proficient in English language. Data collection was  
6 conducted between April and August, 2014 and all measurements were completed at the  
7 participants' home. All participants provided signed informed consent and the study was approved  
8 by the Ethics Committee of the University of Maiduguri Teaching Hospital (ADM/TH/EC/75;  
9 08/04/2014).

### 16 **Instruments**

17  
18 Socio-demographic form was used to collect information about the participant's  
19 characteristics. These include age, marital status, age at time of marriage, years of marriage, number  
20 of children ever born, level of formal education, occupation, religion, area of residence and socio-  
21 economic status. A structured questionnaire was developed from insights provided through previous  
22 studies.<sup>21,26,27</sup> The self-developed questionnaire was interviewer administered and contains 17 items  
23 that assess maternal and child health concerns (See Appendix). The questionnaire has two sections.  
24 Section A addresses maternal health indices while section B addresses child health indices. The  
25 respondents were asked series of questions such as 'have you ever experience domestic violence',  
26 'have you ever experienced pregnancy related complications', 'have you ever had sexually transmitted  
27 infections (STI)', 'was your child's weight at birth low', did the child suffer any infectious illness two weeks  
28 after birth', and 'was any child lost in the last five years'. The response to the questions was anchored on  
29 a dichotomous scale, (1) Yes or (2) No. The face and content validity of the questionnaire was  
30 evaluated by two experts who are specialists in obstetrics and gynecology and maternal and child  
31 health. These specialists have a combined experience of over 23 years and they attested to the face  
32 and content validity of the developed questionnaire. The participants' weight and height were  
33 measured following standardized procedure, using a bathroom weighing scale (HANA, China) and  
34 a locally fabricated wooden height meter that was calibrated, respectively. Body mass index (BMI)  
35 was calculated as body weight divided by the square of height ( $\text{kg}/\text{m}^2$ ), and participants were  
36 categorized as underweight ( $<18.5 \text{ kg}/\text{m}^2$ ), normal weight ( $18.5\text{-} 24.9 \text{ kg}/\text{m}^2$ ), overweight ( $25.0\text{-}$   
37  $29.9 \text{ kg}/\text{m}^2$ ) and obese ( $\geq 30.0 \text{ kg}/\text{m}^2$ ) according to the WHO guidelines.<sup>28</sup>

### 53 **Patient and Public Involvement**

1  
2  
3 Patients were not directly involved in the recruitment to and conduct of the study. However,  
4 authors are practicing physiotherapists two of whom (AJ) and AYO) carry caseloads that includes  
5 pediatric patients and mothers requiring obstetric and gynecological physiotherapy care for more  
6 than 10 years each on a consistent basis. Thus, the authors had long histories of interaction with  
7 adolescent and adult mothers. Since all authors reviewed the questionnaire, approved its use and  
8 attested to its content and face validity, it can be assumed that the development of the research  
9 questionnaire and the design of the study were informed by the priorities, preferences and  
10 experience of the adolescent and adult mothers and the public.  
11  
12  
13  
14  
15  
16  
17

### 18 **Data analyses**

19  
20 Analyses were conducted using the Statistical Package for the Social Science (SPSS)  
21 versions 18. Descriptive statistics of mean, standard deviation and percentages were used to  
22 summarize the participants' socio-demographic characteristics, socio-economic status and marriage  
23 and pregnancy history. Chi-square statistic was used to compare the prevalence of maternal  
24 (obstetric fistula, sexually transmitted disease, postpartum hemorrhage and eclampsia) and child  
25 (low birth weight, child infectious illness and child mortality) health indices between adolescent  
26 mothers (age= 12-17 years) and non-adolescent mothers (age= 18-25 years). Multivariate logistic  
27 regression analysis adjusted for participants' sociodemographic characteristics, socioeconomic  
28 status and marriage and pregnancy history was used to examine the associations between  
29 motherhood in adolescence and maternal and child health indices. All maternal and child health  
30 variables that were significant in the bivariate analysis (chi-square statistics) were included in the  
31 regression models. Alpha-value of 0.05 was used as the level of significance.  
32  
33  
34  
35  
36  
37  
38  
39  
40  
41

### 42 **RESULTS**

43  
44 A total of 247 young mothers (age= 12 – 25 years) were contacted for the study, but only  
45 220 consented and completed the questionnaire, yielding a response rate of 89.1% (220/247). The  
46 mean age of the final sample was  $22.4 \pm 2.5$  years (age range= 14 – 25 years). Half of the  
47 participants were married before the age of 18 years (50.0%, n=110) and had been married for less  
48 than five years (50.5%, n=111). Many of the participants were muslim (92.3%), married (81.8%)  
49 and full-time housewife (60.0%). Compared to adult mothers ( $P < 0.05$ ), most adolescents mothers  
50 were underweight (75.9% vs 24.1%), had no education (75.8% vs 24.2%), had at least four or more  
51  
52  
53  
54  
55  
56  
57  
58  
59  
60



children (96.4% vs 3.6%) and had been married for between five to nine years (68.5% vs 31.5%). Majority of the participants (78.2%) used public tap water, while 10.9% used borehole and 10% used open well water as source of their drinking water. Most of the participants (86.8%) used pit toilet, 9.5% used flush toilet and 3.2% has no toilet facility in their household. Compared to adult mothers ( $P < 0.05$ ), few proportions of adolescent mothers had flush toilets in their homes (9.5% vs 90.5%) and none used gas in their homes for cooking (0.0% vs 100.0%) or had a car in their households (0.0% vs 100.0%). Details of the sociodemographic characteristics and socio-economic status of the participants are shown in Table 1.

**Table 1: Sociodemographic characteristics and socioeconomic status of the participants**

| Variables                               | Total sample<br>N= 220 | Adolescent Mothers<br>n=110 (50%) | Adult Mothers<br>n=110 (50%) | <i>P</i> -value† |
|-----------------------------------------|------------------------|-----------------------------------|------------------------------|------------------|
| <b>Sociodemographic characteristics</b> |                        |                                   |                              |                  |
| <b>Age (Years)</b>                      | 22.36 ± 2.5            | 21.45 ± 2.9                       | 23.37 ± 1.6                  | <0.001*          |
| <b>BMI (Kg/m<sup>2</sup>)</b>           | 22.37 ± 4.0            | 21.84 ± 4.1                       | 22.89 ± 3.8                  | 0.052            |
| <b>Weight Status (n, %)</b>             |                        |                                   |                              |                  |
| Underweight                             | 29 (13.2)              | 22 (75.9)                         | 7 (24.1)                     | 0.029*           |
| Normal                                  | 147 (66.8)             | 68 (46.3)                         | 79 (53.7)                    |                  |
| Overweight                              | 32 (14.5)              | 15 (46.9)                         | 17 (53.1)                    |                  |
| Obese                                   | 12 (5.5)               | 5 (41.7)                          | 7 (58.3)                     |                  |
| <b>Level of Education (n, %)</b>        |                        |                                   |                              |                  |
| None                                    | 33 (15.0)              | 25 (75.8)                         | 8 (24.3)                     | <0.001*          |
| Quranic                                 | 102 (46.4)             | 57 (55.9)                         | 45 (44.1)                    |                  |
| Primary                                 | 30 (13.6)              | 15 (50)                           | 15 (50)                      |                  |
| Secondary                               | 36 (16.4)              | 11 (30.6)                         | 25 (69.4)                    |                  |
| Tertiary                                | 19 (8.6)               | 2 (10.5)                          | 17 (89.5)                    |                  |
| <b>Occupation (n, %)</b>                |                        |                                   |                              |                  |
| Farming                                 | 11 (5.0)               | 6 (54.5)                          | 5 (45.5)                     | 0.281            |
| Trading                                 | 67 (30.5)              | 34 (50.7)                         | 33 (49.3)                    |                  |
| Civil Servant                           | 10 (4.5)               | 2 (20)                            | 8 (80)                       |                  |
| House wife                              | 132 (60.0)             | 68 (51.5)                         | 64 (48.5)                    |                  |
| <b>Religious Affiliation (n, %)</b>     |                        |                                   |                              |                  |
| Muslim                                  | 203 (92.3)             | 103 (50.7)                        | 100 (49.3)                   | 0.449            |
| Christian                               | 17 (7.7)               | 7 (41.2)                          | 10 (58.8)                    |                  |
| <b>Number of children born (n, %)</b>   |                        |                                   |                              |                  |



|                                          |             |            |            |         |
|------------------------------------------|-------------|------------|------------|---------|
| One                                      | 79 (35.9)   | 26 (32.9)  | 53 (67.1)  | <0.001* |
| Two                                      | 68 (30.9)   | 29 (42.6)  | 39 (57.4)  |         |
| Three                                    | 45 (20.5)   | 28 (62.2)  | 17 (37.8)  |         |
| ≥ Four                                   | 28 (12.7)   | 27 (96.4)  | 1 (3.6)    |         |
| <b>Marital Status (n, %)</b>             |             |            |            |         |
| Married                                  | 180 (81.8)  | 92 (51.1)  | 88 (48.9)  | 0.508   |
| Not Married                              | 5 (2.3)     | 2 (40)     | 3 (60)     |         |
| Divorced                                 | 27 (12.3)   | 14 (51.9)  | 13 (48.1)  |         |
| Widowed                                  | 8 (3.6)     | 2 (25)     | 6 (75)     |         |
| <b>Years of Marriage (n, %)^</b>         |             |            |            |         |
| Less than Five                           | 111 (50.5)  | 36 (32.4)  | 75 (67.6)  | <0.001* |
| Five to Nine                             | 108 (49.1)  | 74 (68.5)  | 34 (31.5)  |         |
| <b>Socioeconomic Status</b>              |             |            |            |         |
| <b>Source of Drinking Water (n, %)^</b>  |             |            |            |         |
| Borehole into Dwelling                   | 24 (10.9)   | 10 (41.7)  | 14 (58.3)  | 0.367   |
| Public Tap                               | 172 (78.2%) | 86 (50.0)  | 86 (50.0)  |         |
| Open Well                                | 22 (10.0)   | 14 (63.6)  | 8 (36.4)   |         |
| Surface Water                            | 1 (0.5)     | 0 (0.0)    | 1 (100.0)  |         |
| <b>Type of Toilet Facilities (n, %)^</b> |             |            |            |         |
| Flush Toilet                             | 21 (9.5)    | 2 (9.5)    | 19 (90.5)  | <0.001* |
| Pit Toilet                               | 191 (86.8)  | 105 (55.0) | 86 (45.0)  |         |
| No Facility                              | 7 (3.2)     | 3 (42.9)   | 4 (57.1)   |         |
| <b>Cooking Facilities (n, %)^</b>        |             |            |            |         |
| Gas                                      | 7 (3.2)     | 0 (0.0)    | 7 (100.0)  | 0.004*  |
| Kerosene                                 | 20 (9.1)    | 5 (25.0)   | 15 (75.0)  |         |
| Charcoal                                 | 146 (66.4)  | 79 (54.1)  | 67 (45.9)  |         |
| Firewood                                 | 47 (21.4%)  | 26 (55.3)  | 21 (44.7)  |         |
| <b>Household car/bus (n, %)^</b>         |             |            |            |         |
| Yes                                      | 14 (6.4)    | 0 (0.0)    | 14 (100.0) | <0.001* |
| No                                       | 205 (93.2)  | 109 (53.2) | 96 (46.8)  |         |

†- Values based on independent t-tests statistics for continuous variables and chi-Square Statistics for categorical variables; \*- Significant difference between group ( $P < 0.05$ ); ^- values do not add up to 220 due to missing data ; BMI- Body Mass Index

Table 2 shows the marriage and pregnancy history of the participants. While majority of the participants (68.6%) reported they took decision to get married with their partners, 26.4% responded their marriage were decided by their parents and a few (5%) reported their decision to get married was made by others. Majority of the participants (82.3%) had never discussed family planning with their spouses and a substantial number of the mothers (22.3%) had never attended ante natal care. About 45% of the participants had experienced prolonged labour and 21.4% had

history of miscarriage and few (19.1%) had a history of stillbirth. Almost half (45.5%) delivered their babies in the hospital and were attended to by nurses. About 9% were attended to by doctors and 25.0% delivered their babies at home by traditional birth attendant. Compared to adult mothers ( $P < 0.05$ ), most of the adolescent mothers had their marriage decided by their parents (62.1% vs 37.9%) or others (81.8% vs 18.25%), had experienced prolonged labour (73.7% vs 26.3%), had a history of miscarriage (68.1% vs 31.9%) and stillbirth (81.0% vs 19.0%) and had their babies delivered at home by traditional birth attendants (69.1% vs 30.9%). Significantly fewer number of adolescent mothers (20.5%) had ever discussed family planning with their spouses compared with adult mothers (79.5%).

**Table 2: Participants' marriage and pregnancy history**

| Variables                            | Total sample<br>n (%) | Adolescent mothers<br>n (%) | Adult mothers<br>n (%) | $\chi^2$ | P-values |
|--------------------------------------|-----------------------|-----------------------------|------------------------|----------|----------|
| <b>Decision to marry</b>             |                       |                             |                        |          |          |
| Both partners                        | 151 (68.6)            | 65 (43.0)                   | 86 (57.0)              | 10.754   | 0.005*   |
| Parents                              | 58 (26.4)             | 36 (62.1)                   | 22 (37.9)              |          |          |
| Others                               | 11 (5.0)              | 9 (81.8)                    | 2 (18.2)               |          |          |
| <b>Domestic violence</b>             |                       |                             |                        |          |          |
| Yes                                  | 45 (20.5)             | 27 (60)                     | 18 (40)                | 2.263    | 0.133    |
| No                                   | 175 (79.5)            | 83 (47.4)                   | 92 (52.6)              |          |          |
| <b>Discussion on family planning</b> |                       |                             |                        |          |          |
| Yes                                  | 39 (17.7)             | 8 (20.5)                    | 31 (79.5)              | 16.487   | <0.001*  |
| No                                   | 181 (82.3)            | 102 (56.4)                  | 79 (43.6)              |          |          |
| <b>Ante-natal</b>                    |                       |                             |                        |          |          |
| Yes                                  | 171 (77.7)            | 81 (47.4)                   | 90 (52.6)              | 2.127    | 0.145    |
| No                                   | 49 (22.3)             | 29 (59.2)                   | 20 (40.8)              |          |          |
| <b>Prolonged labour</b>              |                       |                             |                        |          |          |
| Yes                                  | 99 (45.0)             | 73 (73.7)                   | 26 (26.3)              | 40.569   | <0.001*  |
| No                                   | 121 (55.0)            | 37 (30.6)                   | 84 (69.4)              |          |          |
| <b>Miscarriage</b>                   |                       |                             |                        |          |          |
| Yes                                  | 47 (21.4)             | 32 (68.1)                   | 15 (31.9)              | 7.819    | 0.005*   |
| No                                   | 173 (78.6)            | 78 (45.1)                   | 95 (54.9)              |          |          |
| <b>Stillbirth</b>                    |                       |                             |                        |          |          |
| Yes                                  | 42 (19.1)             | 34 (81.0)                   | 8 (19.0)               | 19.893   | <0.001*  |
| No                                   | 178 (80.9)            | 76 (42.7)                   | 102 (57.3)             |          |          |
| <b>Birth Attendance</b>              |                       |                             |                        |          |          |
| Doctor                               | 20 (9.1)              | 7 (35.0)                    | 13 (65.0)              | 14.374   | 0.002*   |
| Nurse                                | 100 (45.5)            | 40 (40.0)                   | 60 (60.0)              |          |          |
| Midwife                              | 45 (20.5)             | 25 (55.6)                   | 20 (44.4)              |          |          |

Traditional BA      55 (25.0)                      38 (69.1)                      17 (30.9)

n = frequency, % =percentage, BA = Birth Attendant, \*- Significant difference between group ( $P < 0.05$ )

Table 3 shows the difference in prevalence of maternal and child health indices between adolescent and adult mothers. Respondents who commenced childbearing between 14-17 years of age experienced at least one pregnancy or birth related health problem and their children had more health concerns than those who commenced childbearing above 17 years. A substantial number of those that commenced child bearing early reported having fistula (22% vs 0.0%) and had higher prevalence of sexually transmitted infection (38% vs 5%) when compared to adult mothers ( $P < 0.001$ ). Postpartum hemorrhage (59% vs 13%,  $P < 0.001$ ) and eclampsia (20% vs 8%,  $P = 0.020$ ) were more prevalent among adolescent mothers than among adult mothers. Just as for maternal health indices, all child health indices such as child infections (21% vs 10%,  $P = 0.040$ ), child loss within 5 years (21% vs 7%,  $P = 0.006$ ) and low child birth weight (55% vs 29%,  $P < 0.001$ ) were more frequently reported for children of adolescent mothers when compared to children of the adult mothers.

**Table 3: Chi-square statistics for difference in the prevalence of maternal and child health indices between adolescent mothers and non-adolescent mothers**

| Variables                    | Motherhood Description |             |               |             | $\chi^2$ | P-value   |
|------------------------------|------------------------|-------------|---------------|-------------|----------|-----------|
|                              | Adolescent mothers     |             | Adult mothers |             |          |           |
|                              | Yes<br>n (%)           | No<br>n (%) | Yes<br>n (%)  | No<br>n (%) |          |           |
| Presence of fistula          | 24 (22.0)              | 86 (78.0)   | 0 (0.0)       | 110 (100.0) | 26.939   | <0.001**  |
| Sexual transmitted infection | 42 (38.0)              | 68 (62.0)   | 6 (5.0)       | 104 (95.0)  | 34.535   | <0.001**  |
| Post-partum hemorrhage       | 65 (59.0)              | 45 (41.0)   | 14 (13.0)     | 96 (87.0)   | 51.371   | < 0.001** |
| Eclampsia                    | 22 (20.0)              | 88 (80.0)   | 9 (8.0)       | 101 (92.0)  | 6.346    | 0.020*    |

|                          |           |           |           |            |       |         |
|--------------------------|-----------|-----------|-----------|------------|-------|---------|
| Child infectious illness | 23 (21.0) | 86 (78.0) | 11 (10.0) | 98 (89.0)  | 5.018 | 0.040*  |
| Child lost in 5years     | 23 (21.0) | 86 (78.0) | 8 (7.0)   | 100 (91.0) | 8.307 | 0.006*  |
| Normal child weight      | 49 (45.0) | 61 (55.0) | 78 (71.0) | 32 (29.0)  | 15.67 | <0.001* |

\*- Significant difference between group ( $P < 0.05$ )

Table 4 shows the association of motherhood in adolescence with maternal and child health indices. Adolescent mothers were about 5 times more likely to experience fistula (OR=5.01, 95%CI=3.01-14.27), more than 6 times likely to have postpartum hemorrhage (OR=6.83, 95%CI=2.93-15.92) and sexually transmitted infections (OR=6.29, 95%CI=2.26-17.51), and more than 3 times likely to lose a child within 5 years of birth (OR=3.52, 95%CI=1.07-11.60), than adult mothers. Children born to adolescent mothers were 66% less likely to have a normal weight at birth (OR=0.34, 95%CI=0.15-0.73) than those born to adult mothers.

**Table 4: Association of adolescent motherhood with maternal and child health indices**

| Variables                           | Adolescent mothers (< 18 years old) |                    |
|-------------------------------------|-------------------------------------|--------------------|
|                                     | Unadj O.R (95% CI)                  | Adj† O.R (95% CI)  |
| <b>Presence of fistula</b>          |                                     |                    |
| No                                  | 1.00                                | 1.00               |
| Yes                                 | 9.18 (0.00)                         | 5.01 (3.01-14.27)* |
| <b>Sexual transmitted infection</b> |                                     |                    |
| No                                  | 1.00                                | 1.00               |
| Yes                                 | 7.24 (2.41-21.70)*                  | 6.29(2.26-17.51)*  |
| <b>Presence of eclampsia</b>        |                                     |                    |
| No                                  | 1.00                                | 1.00               |
| Yes                                 | 2.20 (0.68-7.03)                    | 2.17 (0.70-6.68)   |
| <b>Postpartum hemorrhage</b>        |                                     |                    |
| No                                  | 1.00                                | 1.00               |
| Yes                                 | 8.19 (3.73-17.97)*                  | 6.83 (2.93-15.92)* |
| <b>Child infectious illness</b>     |                                     |                    |
| No                                  | 1.00                                | 1.00               |
| Yes                                 | 0.96 (0.33-2.78)                    | 1.20 (0.44- 3.29)  |

**Child lost in 5 years**

|     |                    |                  |
|-----|--------------------|------------------|
| No  | 1.00               | 1.00             |
| Yes | 3.52 (1.07-11.60)* | 2.30 (0.74-7.15) |

**Normal child weight at birth**

|     |                   |                   |
|-----|-------------------|-------------------|
| No  | 1.00              | 1.00              |
| Yes | 0.39 (0.17-0.89)* | 0.34 (0.15-0.73)* |

---

Adj= Adjusted, Unadj= Unadjusted, OR= Odd Ratio, CI =Confidence Interval

†= Odd Ratio adjusted for participants' sociodemographic characteristics, socioeconomic status and marriage and pregnancy characteristic. \*-Significant at  $P < 0.05$ , Model fit: (Chi-Square = 113.182;  $df=7$ ; -2 Log Likelihood = 184.867;  $R^2= 0.564$ ;  $P < 0.001$ ).

**DISCUSSION**

Adolescent motherhood in the developing African countries is a global health problem, and periodic evaluation of its impacts on population health status is important to assessing progress in this context. The main finding of the present study was that adolescent mothers aged 14-17 years reported higher maternal morbidity and child morbidity and mortality indices compared to adult mothers aged 18 years and above. Broadly, this finding from Nigeria supports the conclusions from multiple international literature that child bearing during adolescence is associated with adverse maternal, perinatal and child health indices.<sup>13-18</sup>

Our finding of higher likelihood (more than 5 times) of experiencing fistula among adolescent mothers compared to their adult counterparts is similar to the findings of Melo *et al.*, in Brazil which reported that adolescent mothers are about 8 times more likely to experience fistula than adult mothers.<sup>26</sup> Also, the finding that a substantial proportion of adolescent mothers had obstetric fistula in the present study is comparable to previous studies that 26% and 20% of minor mothers had experienced vesico and recto vaginal fistula in Adamawa, Nigeria and Ethiopia, respectively.<sup>21,29</sup>

In the present study, adolescent mothers tended to report sexually transmitted infection more frequently (38%) than mothers who married at the age of 18 and above. This finding is consistent with reports from Kenya and Zambia that teenage mothers have high rate (39%) of sexually transmitted infection.<sup>30</sup> Moreover, our finding that adolescent mothers were more than 6 times

1  
2  
3 likely to have sexually transmitted infection than their adult counterparts is consistent with a  
4 previous Nigerian study which found that teenage mothers were 6.7 times likely to experience  
5 sexually transmitted infection than their adult counterparts.<sup>21</sup>  
6  
7

8 In contrast to previous studies from Ethiopia and Nigeria that found lower postpartum  
9 hemorrhage rate (17.2% and 19%, respectively) among adolescent mothers,<sup>21,29</sup> postpartum  
10 hemorrhage was more frequently (59.0%) reported by adolescent mothers in the present study.  
11 However, our finding that adolescent mothers were 6 times more likely to experience post-partum  
12 hemorrhage compared to adult mothers is consistent with the finding in Ethiopia that adolescent  
13 mothers were about 4 times more likely to report postpartum hemorrhage.<sup>29</sup> Although the  
14 prevalence of eclampsia was higher among adolescent mothers and they were about twice more  
15 likely to have eclampsia than their adult mothers counterparts in the present study, we did not find  
16 association between motherhood in adolescence and eclampsia. This finding was somewhat  
17 contrary to that of a hospital-based study in Nigeria that reported significant association between  
18 patients' relative perception of early marriage and eclampsia.<sup>31</sup>  
19  
20  
21  
22  
23  
24  
25  
26

27 Adolescent mothers tended to report child infectious illness more frequently than their adult  
28 counterparts in the present study. This finding is at variance with a previous Indian study that found  
29 no proportional difference in the occurrence of child respiratory infection and diarrhea between  
30 minor mothers and non-minor ones.<sup>27</sup> However, our finding that adolescents mothers were 1.2 times  
31 likely to have children with infectious illness than the adult mothers is consistent with the Indian  
32 study which found adolescent mothers were 1.3 times likely to have child infectious illness than the  
33 adult mothers.<sup>27</sup> Also, consistent with the findings of Raj *et al.*, in which Indian adolescent mothers  
34 were 2.5 times more likely to experience the loss of an infant or child,<sup>27</sup> we found the 2 times higher  
35 likelihood of child loss within 5 years among adolescent mothers compared to their adult  
36 counterparts. Also, our finding that children born to adolescent mothers were less likely to have a  
37 normal weight baby at birth than those born to adult mothers is consistent with previous findings  
38 that children of adolescent mothers in India and Brazil were more likely to have low birth weight  
39 when compared to their adult mother counterparts.<sup>26,27</sup>  
40  
41  
42  
43  
44  
45  
46  
47  
48  
49

50 Generally, the findings of the present study have practical implications for population and  
51 community health in Maiduguri and Nigeria. Public health professionals, including physiotherapists  
52 in health promotion and primary health care, can use the evidence to develop educational  
53 programmes and campaign to improve awareness and advocacy on the health consequences of early  
54  
55  
56  
57  
58  
59

1  
2  
3 motherhood. For instance, parents and community and religious leaders could be sensitized that  
4 early marriage and motherhood during adolescence is a risk factor for multiple negative maternal  
5 and child health indices such as eclampsia, fistula, sexually transmitted infection, postpartum  
6 hemorrhage and infant morbidity and mortality. With results of the current study, traditional and  
7 religious leaders, long recognized as key partners to ending the harmful practice of child marriage  
8 in Africa,<sup>32</sup> can be appropriately mobilized and their support enlisted in Maiduguri towards  
9 delaying girls' marriage till full maturity. Moreover, the findings could provide factual tools for  
10 policy makers, responsible for health planning and funding, to improve maternal and child health  
11 indices in Maiduguri. There is evidence that reducing adolescent births among young girls, as well  
12 as ensuring that pregnant adolescents have access to quality maternal health services are effective  
13 strategies for addressing the problem of neonatal mortality and negative health outcomes among  
14 both adolescent mothers and their infants in the developing countries.<sup>17</sup> Until now, only one study  
15 has provided empirical data on the impact of early marriage practices in northeastern Nigeria.<sup>21</sup>  
16 Therefore, scarce evidence-based information such as in the present study is relevant for policy  
17 makers to enhance effective and targeted interventions to improve maternal and child health in the  
18 northeast of Nigeria which is the most economically disadvantaged and medically underserved  
19 region of Nigeria.  
20  
21  
22  
23  
24  
25  
26  
27  
28  
29  
30  
31

32 Our study has some important limitations that should be considered when interpreting the  
33 findings. First, the study adopted a cross-sectional design, in which causality between motherhood  
34 in adolescence and maternal and child health indices cannot be inferred. Second, the questionnaire  
35 utilized for the study did not explore important pregnancy related complications like heavy bleeding  
36 and anaemia, and its construct validity and reliability are unknown. However, the items in the  
37 questionnaire are similar to those used in previous studies.<sup>21,26,27</sup> Third, the maternal and child  
38 health consequences explored in the present study is presented in child mortality and morbidity  
39 counts and prevalence only. The cost of care and burden of diseases due to early motherhood have  
40 not been analysed in pecuniary terms, neither has this cost been compared with cost of care for adult  
41 mothers. Fourth, the study involved a convenience sample of urban living mothers in a metropolitan  
42 city. Thus, the findings may not generalize to other samples with different demographics in the  
43 Nigerian society. Also, the inherent selection bias (i.e., presence of systematic differences between  
44 the groups of adolescent and adult mothers) arising from non-matching of participants in the  
45 sampling strategy constitute a limitation to the present study. However, the study utilized equal  
46  
47  
48  
49  
50  
51  
52  
53  
54  
55  
56  
57  
58  
59  
60



1  
2  
3 sample of adolescent and adult mothers, and the data analysis accounted for differences in  
4 participants' sociodemographics to make the result more robust. Moreover, this is a preliminary  
5 study and the findings suggest that motherhood in adolescence is a potential risk factor to some  
6 adverse maternal and child health indices. In order to better estimate the impact of early marriage  
7 and motherhood on maternal and child morbidity for Nigeria or identify any pattern to the disease  
8 burden, there is the need for an expanded survey at a regional or national scale to include the rural  
9 population in Nigeria.  
10  
11  
12  
13  
14  
15

## 16 17 **CONCLUSIONS**

18  
19 Adolescent motherhood was associated with negative maternal and child health indices  
20 among urban dwelling mothers in Maiduguri city. The findings suggest the need for community  
21 health promotion and public health interventions to improve maternal and child health among early  
22 married mothers in Maiduguri. Data from the study can be used by public health professionals  
23 including physiotherapists in this role to inform effective primary health care practice and  
24 community health advocacy to improve maternal and child health indices in Maiduguri. However,  
25 for effective population wide public health actions to improve maternal and child health in Nigeria,  
26 future studies are needed to confirm this evidence at the regional or national level including the  
27 rural population in Nigeria.  
28  
29  
30  
31  
32  
33  
34  
35  
36

37 **Contributors:** ALO, SUA, FS, AAU, AMJ and AYO were involved in the design of the study.  
38 SUA, FS, AMJ and AYO led the data collection. SUA, FS and AYO led data cleaning and data  
39 analysis. ALO contributed to data analysis and interpretation of results. ALO and AYO wrote the  
40 manuscript. SUA, FS and AAU revised the drafted manuscript. ALO drafted the revisions. All  
41 authors gave approval of the final manuscript.  
42  
43  
44  
45  
46

47 **Funding:** None.  
48  
49

50 **Competing interests:** None declared.  
51  
52  
53

54 **Patient consent:** Participants consent obtained.  
55  
56  
57  
58  
59  
60



**Ethics approval:** This study was reviewed and approved by the ethical committee of the University of Maiduguri Teaching Hospital, Maiduguri, Nigeria (ADM/TH/EC/75; 08/04/2014).

**Data sharing statement:** No additional data are available.

## REFERENCES

1. World Health Organization [Internet]. Adolescent pregnancy: WHO factsheet 2018. <http://www.who.int/en/news-room/fact-sheets/detail/adolescent-pregnancy> (accessed Nov 04, 2018).
2. United Nations Children's Fund. *Early Marriage: A Harmful Traditional Practice*. A Statistical Exploration. New York: UNICEF, 2005. [https://www.unicef.org/publications/index\\_26024.html](https://www.unicef.org/publications/index_26024.html) (accessed 12 March 2018).
3. Parsons J, Edmeades J, Kes A, Petroni S, Sexton M, Wodon Q. Economic impacts of child marriage: A review of the literature. *The Review of Faith & International Affairs* 2015;13(3):12-22, DOI: 10.1080/15570274.2015.1075757
4. United Nations Population Fund-United Nations Children's Fund. *Global programme to accelerate action to end child marriage. Progress report 2016*. UNFPA-UNICEF, 2017. <https://www.unicef.org/protection/files/ChildMarriage-Global-DonorReport-v7.pdf> (accessed 12 March 2018).
5. United Nations Children's Fund, *Accelerating Efforts to Eliminate Child Marriage in Africa*. New York: UNICEF, 2017 [https://www.unicef.org/protection/files/Child\\_Marriage\\_Brochure\\_2017.pdf](https://www.unicef.org/protection/files/Child_Marriage_Brochure_2017.pdf) (accessed 12 March 2018).
6. United Nations Children's Fund. *Ending Child Marriage: Progress and prospects*. New York: UNICEF, 2014. <https://data.unicef.org/resources/ending-child-marriage-progress-and-prospects/> (accessed 12 March 2018)
7. Nour NM. Health consequences of child marriage in Africa. *Emerg Infect Dis* 2006;12(11):1644-9.
8. World Health Organization. *Obstetric Fistula. Guiding principles for clinical management and programed development*. Geneva: World Health Press, 2006:

- 1  
2  
3 [http://www.who.int/reproductivehealth/publications/maternal\\_perinatal\\_health/9241593679/](http://www.who.int/reproductivehealth/publications/maternal_perinatal_health/9241593679/en/)  
4 [en/](http://www.who.int/reproductivehealth/publications/maternal_perinatal_health/9241593679/en/) (accessed 12 March 2018).  
5  
6  
7 9. Nour NM. Child marriage: A Silent and human rights issue. *Rev Obstet Gynecol* 2009; 2(1):  
8 51–56.  
9  
10 10. World Health Organization. *Meeting to develop a global consensus on preconception care*  
11 *to reduce maternal and childhood mortality and morbidity*. Geneva: WHO, 2013.  
12  
13 11. Say L, Raine R. A systematic review of inequalities in the use of maternal health care in  
14 developing countries: examining the scale of the problem and the importance of context.  
15 *Bull World Health Organ* 2007;85(10):812–9.  
16  
17 12. Langlois EV, Miskurka M, Zunzunegui MV, Ghaffar A, Ziegler D, Karp I. Inequities in  
18 postnatal care in low- and middle-income countries: a systematic review and meta-analysis.  
19 *Bull World Health Organ* 2015;93:259-70  
20  
21 13. Chen X-K, Wen SW, Fleming N, Demissie K, Rhoads GG, Walker M. Teenage pregnancy  
22 and adverse birth outcomes: a large population based retrospective cohort study. *Int J*  
23 *Epidemiol.* 2007; 36(2):368 - 73. <https://doi.org/10.1093/ije/dyl284>  
24  
25 14. de Vienne CM, Creveuil C, Dreyfus M. Does young maternal age increase the risk of  
26 adverse obstetric, fetal and neonatal outcomes: a cohort study. *Eur J Obstet Gynecol Reprod*  
27 *Biol* 2009;147:151–6.  
28  
29 15. Chen CW, Tsai CY, Sung FC, et al. Adverse birth outcomes among pregnancies of teen  
30 mothers: age-specific analysis of national data in Taiwan. *Child Care Health Dev*  
31 2010;36:232–40.  
32  
33 16. Marvin-Dowle K, Kilner K, Burley VJ, et al. Impact of adolescent age on maternal and  
34 neonatal outcomes in the Born in Bradford cohort. *BMJ Open* 2018;8:e016258.  
35 [doi:10.1136/bmjopen-2017-016258](https://doi.org/10.1136/bmjopen-2017-016258)  
36  
37 17. Neal S, Channon AA, Chintsanya J. The impact of young maternal age at birth on neonatal  
38 mortality: Evidence from 45 low- and middle- income countries. *PLoS ONE* 2018;13(5):  
39 e0195731. <https://doi.org/10.1371/journal.pone.0195731>  
40  
41 18. Ganchimeg T, Ota E, Morisaki N, et al. Pregnancy and childbirth outcomes among  
42 adolescent mothers: a World Health Organization multicountry study. *Brit J Obstet Gynaec.*  
43 2014; 121(s1):40 - 8.  
44  
45  
46  
47  
48  
49  
50  
51  
52  
53  
54  
55  
56  
57  
58  
59  
60

19. Walker JA, Mukisa S, Hashim Y, Ismail H. *Mapping Early Marriage in West Africa: A Scan of Trends, Interventions, What Works, Best Practices, and the Way Forward*. Ford Foundation, 2013.
20. Alkema L, Chou D, Hogan D, et al. Global, regional, and national levels and trends in maternal mortality between 1990 and 2015, with scenario-based projections to 2030: A systematic analysis by the UN Maternal Mortality Estimation Inter-Agency Group. *Lancet* 2016;387(10017):462–74.
21. Adedokun O, Adeyemi O, Dauda C. Child marriage and maternal health risks among young mothers in Gombi, Adamawa State, Nigeria: Implications for mortality, entitlements and freedoms. *Afri Health Sci* 2016;16(4): 986-99.
22. Federal Ministry of Health. *National Health Policy 2016: Promoting the Health of Nigerians to Accelerate Socioeconomic Development*. FMOH, September 2016
23. Population City. Maiduguri population, 2018. <http://population.city/nigeria/maiduguri/> (accessed 03 March 2018)
24. Cohen JA: *Statistical Power Analysis for the Behavioural Sciences*. 2nd edition. Hillsdale, NJ: Lawrence Erlbaum Associates; 1988.
25. National Population Commission (NPC) [Nigeria] and ICF International 2014 Nigeria Demographic and Health Survey 2013. Abuja, Nigeria and Rockville, MD, NPC and ICF International.
26. Melo EC, Ribeiro AB, de Oliveira RR, Zurita RC, Mathias TA. Analysis of maternal and child health indicators in an area at Parana State, Brazil. *Nurs Res Pract* 2013;495178. doi: 10.1155/2013/495178.
27. Raj A, Saggurti N, Winter M, et al. The effect of maternal child marriage on morbidity and mortality of children under 5 in India: Cross sectional study of a nationally representative sample. *BMJ* 2010;340:b4258. doi:10.1136/bmj.b4258
28. World Health Organization. *Obesity: Prevention and managing the global epidemic*. Report of a WHO consultation on obesity. Geneva, Switzerland: World Health Organization; 1988.
29. Pathfinder International Ethiopia. *Report on causes and consequences of early marriage in Amhara region*. Addis Ababa: Pathfinder International, 2006.  
<http://www.pathfinder.org/publications/causes-and-consequences-of-early-marriage-in-the-amhara-region-of-ethiopia/> (accessed 29 March 2018).

- 1  
2  
3 30. International Women's Health Program. *Early Marriage*. The Society of Obstetricians and  
4 Gynaecologists of Canada. Web. 30 Apr. 2010. [http://iwhp.sogc.org/index.php?page=early-](http://iwhp.sogc.org/index.php?page=early-marriage)  
5 [marriage](http://iwhp.sogc.org/index.php?page=early-marriage) (accessed 01 April 2018)  
6  
7  
8 31. Adamu AN, Tunau KA, Hassan M, Ekele BA. The perception of patients' relations on the  
9 cause of eclampsia. *Gynecol Obstet (Sunnyvale)* 4: 205. doi:10.4172/2161-0932.1000205  
10  
11 32. African Union. *Campaign to end child marriage in Africa. The Effects of Traditional and*  
12 *Religious Practices of Child Marriage on Africa's Socio-Economic Development. A Review*  
13 *of Research, Reports and Toolkits from Africa, 2015.*  
14 [https://au.int/sites/default/files/documents/31018-doc-5465\\_ccmc\\_africa\\_report.pdf](https://au.int/sites/default/files/documents/31018-doc-5465_ccmc_africa_report.pdf)  
15  
16 (accessed 01 April 2018)  
17  
18  
19  
20  
21  
22  
23  
24  
25  
26  
27  
28  
29  
30  
31  
32  
33  
34  
35  
36  
37  
38  
39  
40  
41  
42  
43  
44  
45  
46  
47  
48  
49  
50  
51  
52  
53  
54  
55  
56  
57  
58  
59  
60

## QUESTIONNAIRE ASSESSING MATERNAL AND CHILD HEALTH INDICES

### Socio-demographic Form

1. Age.....years
2. Age at the time of marriage.....years
3. Height.....meters
4. Weight.....kg
5. Child Age.....years
6. Child Sex
  - Male.....1
  - Female.....2
7. Highest level of formal Education
  - NIL.....1
  - Primary.....2
  - Secondary.....3
  - Tertiary.....4
8. Occupation
  - Farming .....1
  - Trading.....2
  - Civil Servant.....3
  - House wife.....4
9. Religious affiliation
  - Muslim.....1
  - Christian .....2
10. Number of children ever born
  - One.....1
  - Two.....2
  - Three.....3
  - Four and above.....4
11. Marital status
  - Married.....1
  - Not married.....2
  - Divorced.....3
  - Widowed.....4
12. Duration of marriage (years)
  - Less Than 5.....1
  - 5 to 9.....2

### Household Items

13. Main source of drinking water?
  - Piped water/bore hole into dwelling.....1
  - Public tap/bore hole.....2
  - Open well into dwelling.....3
  - Surface Water.....4
  - Others .....5
14. Type of Toilet Facilities in your House hold?
  - Flush toilet.....1
  - Pit toilet/latrine.....2

|    |                                                      |                   |
|----|------------------------------------------------------|-------------------|
| 1  |                                                      |                   |
| 2  |                                                      |                   |
| 3  |                                                      | No Facility.....3 |
| 4  | 15. What does your household mainly use for cooking? |                   |
| 5  |                                                      | Gas.....1         |
| 6  |                                                      | Kerosene.....2    |
| 7  |                                                      | Charcoal.....3    |
| 8  |                                                      | Fire wood.....4   |
| 9  |                                                      |                   |
| 10 | 16. Do you have a car or bus in your household?      |                   |
| 11 |                                                      | Yes.....1         |
| 12 |                                                      | No.....2          |
| 13 |                                                      |                   |
| 14 |                                                      |                   |

## Questions on Maternal and Child Health Indices

### Section A: Maternal issues

|    |                                                         |                     |
|----|---------------------------------------------------------|---------------------|
| 17 | 1. The decision to marry taken by?                      |                     |
| 18 |                                                         | Both partners.....1 |
| 19 |                                                         | Parents.....2       |
| 20 |                                                         | Others.....3        |
| 21 |                                                         |                     |
| 22 | 2. Ever experience Domestic violence?                   |                     |
| 23 |                                                         | Yes.....1           |
| 24 |                                                         | No.....2            |
| 25 | 3. Ever had discussion on family planning with spouse?  |                     |
| 26 |                                                         | Yes.....1           |
| 27 |                                                         | No.....2            |
| 28 |                                                         |                     |
| 29 | 4. Ever experienced pregnancy related complications?    |                     |
| 30 |                                                         | Yes.....1           |
| 31 |                                                         | No.....2            |
| 32 | 5. Ever experienced postpartum hemorrhage?              |                     |
| 33 |                                                         | Yes.....1           |
| 34 |                                                         | No.....2            |
| 35 |                                                         |                     |
| 36 | 6. Ever had Eclampsia?                                  |                     |
| 37 |                                                         | Yes.....1           |
| 38 |                                                         | No.....2            |
| 39 | 7. Ever experienced Obstructed and/or prolonged Labor?  |                     |
| 40 |                                                         | Yes.....1           |
| 41 |                                                         | No.....2            |
| 42 |                                                         |                     |
| 43 | 8. Ever had prolonged sickness after child birth?       |                     |
| 44 |                                                         | Yes.....1           |
| 45 |                                                         | No.....2            |
| 46 | 9. Ever Experienced Fistula?                            |                     |
| 47 |                                                         | Yes.....1           |
| 48 |                                                         | No.....2            |
| 49 |                                                         |                     |
| 50 | 10. Ever had sexually transmitted infections (STI)?     |                     |
| 51 |                                                         | Yes.....1           |
| 52 |                                                         | No.....2            |
| 53 |                                                         |                     |
| 54 | 11. Type of Health personnel for delivery of last child |                     |
| 55 |                                                         | Doctor.....1        |
| 56 |                                                         |                     |
| 57 |                                                         |                     |
| 58 |                                                         |                     |
| 59 |                                                         |                     |
| 60 |                                                         |                     |

|    |                                                     |                                 |
|----|-----------------------------------------------------|---------------------------------|
| 1  |                                                     |                                 |
| 2  |                                                     |                                 |
| 3  |                                                     | Nurse.....2                     |
| 4  |                                                     | Midwife.....3                   |
| 5  |                                                     | Traditional birth attendant...4 |
| 6  |                                                     |                                 |
| 7  | 12. Do you attend ante natal care during pregnancy? |                                 |
| 8  |                                                     | Yes.....1                       |
| 9  |                                                     | No.....2                        |
| 10 | 13. Ever had history of miscarriage?                |                                 |
| 11 |                                                     | Yes.....1                       |
| 12 |                                                     | No.....2                        |
| 13 |                                                     |                                 |

### Section B: Child items

|    |                                                                         |           |
|----|-------------------------------------------------------------------------|-----------|
| 14 |                                                                         |           |
| 15 |                                                                         |           |
| 16 | 14. Child weight at birth.....kg                                        |           |
| 17 | 15. Does your child weight at birth low?                                |           |
| 18 |                                                                         | Yes.....1 |
| 19 |                                                                         | No.....2  |
| 20 | 16. Does the child suffer any infectious illness two weeks after birth? |           |
| 21 |                                                                         | Yes.....1 |
| 22 |                                                                         | No.....2  |
| 23 |                                                                         |           |
| 24 | If yes please specify.....                                              |           |
| 25 | 17. Any child lost in the last five years?                              |           |
| 26 |                                                                         | Yes.....1 |
| 27 |                                                                         | No.....2  |
| 28 | 18. Ever had stillbirth?                                                |           |
| 29 |                                                                         | Yes.....1 |
| 30 |                                                                         | No.....2  |
| 31 |                                                                         |           |
| 32 |                                                                         |           |
| 33 |                                                                         |           |
| 34 |                                                                         |           |
| 35 |                                                                         |           |
| 36 |                                                                         |           |
| 37 |                                                                         |           |
| 38 |                                                                         |           |
| 39 |                                                                         |           |
| 40 |                                                                         |           |
| 41 |                                                                         |           |
| 42 |                                                                         |           |
| 43 |                                                                         |           |
| 44 |                                                                         |           |
| 45 |                                                                         |           |
| 46 |                                                                         |           |
| 47 |                                                                         |           |
| 48 |                                                                         |           |
| 49 |                                                                         |           |
| 50 |                                                                         |           |
| 51 |                                                                         |           |
| 52 |                                                                         |           |
| 53 |                                                                         |           |
| 54 |                                                                         |           |
| 55 |                                                                         |           |
| 56 |                                                                         |           |
| 57 |                                                                         |           |
| 58 |                                                                         |           |
| 59 |                                                                         |           |
| 60 |                                                                         |           |

1  
2  
3  
4  
5  
6  
7  
8  
9  
10  
11  
12  
13  
14  
15  
16  
17  
18  
19  
20  
21  
22  
23  
24  
25  
26  
27  
28  
29  
30  
31  
32  
33  
34  
35  
36  
37  
38  
39  
40  
41  
42  
43  
44  
45  
46  
47  
48  
49  
50  
51  
52  
53  
54  
55  
56  
57  
58  
59  
60STROBE Statement—Checklist of items that should be included in reports of *cross-sectional studies*

|                              | Item No | Recommendation                                                                                                                                                                                                                                                                                                                                                                                |
|------------------------------|---------|-----------------------------------------------------------------------------------------------------------------------------------------------------------------------------------------------------------------------------------------------------------------------------------------------------------------------------------------------------------------------------------------------|
| <b>Title and abstract</b>    | 1       | (a) Indicate the study's design with a commonly used term in the title or the abstract [pg1]<br>(b) Provide in the abstract an informative and balanced summary of what was done and what was found [pg2]                                                                                                                                                                                     |
| <b>Introduction</b>          |         |                                                                                                                                                                                                                                                                                                                                                                                               |
| Background/rationale         | 2       | Explain the scientific background and rationale for the investigation being reported [pg4-5]                                                                                                                                                                                                                                                                                                  |
| Objectives                   | 3       | State specific objectives, including any prespecified hypotheses [pg5]                                                                                                                                                                                                                                                                                                                        |
| <b>Methods</b>               |         |                                                                                                                                                                                                                                                                                                                                                                                               |
| Study design                 | 4       | Present key elements of study design early in the paper [pg6]                                                                                                                                                                                                                                                                                                                                 |
| Setting                      | 5       | Describe the setting, locations, and relevant dates, including periods of recruitment, exposure, follow-up, and data collection [pg6-7]                                                                                                                                                                                                                                                       |
| Participants                 | 6       | (a) Give the eligibility criteria, and the sources and methods of selection of participants [pg6]                                                                                                                                                                                                                                                                                             |
| Variables                    | 7       | Clearly define all outcomes, exposures, predictors, potential confounders, and effect modifiers. Give diagnostic criteria, if applicable [pg7]                                                                                                                                                                                                                                                |
| Data sources/<br>measurement | 8*      | For each variable of interest, give sources of data and details of methods of assessment (measurement). Describe comparability of assessment methods if there is more than one group [pg7]                                                                                                                                                                                                    |
| Bias                         | 9       | Describe any efforts to address potential sources of bias                                                                                                                                                                                                                                                                                                                                     |
| Study size                   | 10      | Explain how the study size was arrived at [pg6]                                                                                                                                                                                                                                                                                                                                               |
| Quantitative variables       | 11      | Explain how quantitative variables were handled in the analyses. If applicable, describe which groupings were chosen and why                                                                                                                                                                                                                                                                  |
| Statistical methods          | 12      | (a) Describe all statistical methods, including those used to control for confounding [pg8]<br>(b) Describe any methods used to examine subgroups and interactions<br>(c) Explain how missing data were addressed<br>(d) If applicable, describe analytical methods taking account of sampling strategy<br>(e) Describe any sensitivity analyses                                              |
| <b>Results</b>               |         |                                                                                                                                                                                                                                                                                                                                                                                               |
| Participants                 | 13*     | (a) Report numbers of individuals at each stage of study—eg numbers potentially eligible, examined for eligibility, confirmed eligible, included in the study, completing follow-up, and analysed<br>(b) Give reasons for non-participation at each stage<br>(c) Consider use of a flow diagram                                                                                               |
| Descriptive data             | 14*     | (a) Give characteristics of study participants (eg demographic, clinical, social) and information on exposures and potential confounders [pg8]<br>(b) Indicate number of participants with missing data for each variable of interest                                                                                                                                                         |
| Outcome data                 | 15*     | Report numbers of outcome events or summary measures [pg10-11]                                                                                                                                                                                                                                                                                                                                |
| Main results                 | 16      | (a) Give unadjusted estimates and, if applicable, confounder-adjusted estimates and their precision (eg, 95% confidence interval). Make clear which confounders were adjusted for and why they were included [pg12]<br>(b) Report category boundaries when continuous variables were categorized<br>(c) If relevant, consider translating estimates of relative risk into absolute risk for a |



|                          |    |                                                                                                                                                                                      |
|--------------------------|----|--------------------------------------------------------------------------------------------------------------------------------------------------------------------------------------|
|                          |    | meaningful time period                                                                                                                                                               |
| Other analyses           | 17 | Report other analyses done—eg analyses of subgroups and interactions, and sensitivity analyses                                                                                       |
| <b>Discussion</b>        |    |                                                                                                                                                                                      |
| Key results              | 18 | Summarise key results with reference to study objectives [pg14]                                                                                                                      |
| Limitations              | 19 | Discuss limitations of the study, taking into account sources of potential bias or imprecision. Discuss both direction and magnitude of any potential bias [pg16]                    |
| Interpretation           | 20 | Give a cautious overall interpretation of results considering objectives, limitations, multiplicity of analyses, results from similar studies, and other relevant evidence [pg14-16] |
| Generalisability         | 21 | Discuss the generalisability (external validity) of the study results [pg16]                                                                                                         |
| <b>Other information</b> |    |                                                                                                                                                                                      |
| Funding                  | 22 | Give the source of funding and the role of the funders for the present study and, if applicable, for the original study on which the present article is based [pg17]                 |

\*Give information separately for exposed and unexposed groups.

**Note:** An Explanation and Elaboration article discusses each checklist item and gives methodological background and published examples of transparent reporting. The STROBE checklist is best used in conjunction with this article (freely available on the Web sites of PLoS Medicine at <http://www.plosmedicine.org/>, Annals of Internal Medicine at <http://www.annals.org/>, and Epidemiology at <http://www.epidem.com/>). Information on the STROBE Initiative is available at [www.strobe-statement.org](http://www.strobe-statement.org).
